1 **PERIOD phosphorylation leads to feedback inhibition of CK1**  
2 **activity to control circadian period**

3 Jonathan M. Philpott<sup>1</sup>, Alfred M. Freeberg<sup>1</sup>, Jiyoung Park<sup>2</sup>, Kwangjun Lee<sup>2</sup>, Clarisse G. Ricci<sup>3‡</sup>,  
4 Sabrina R. Hunt<sup>1</sup>, Rajesh Narasimamurthy<sup>4</sup>, David H. Segal<sup>1</sup>, Rafael Robles<sup>1</sup>, Yao D. Cai<sup>5</sup>,  
5 Sarvind Tripathi<sup>1</sup>, J. Andrew McCammon<sup>3,6</sup>, David M. Virshup<sup>4,7</sup>, Joanna C. Chiu<sup>5</sup>, Choogon  
6 Lee<sup>2\*</sup>, Carrie L. Partch<sup>1,8,9,\*</sup>

7

8 <sup>1</sup>Department of Chemistry and Biochemistry, University of California Santa Cruz, Santa Cruz,  
9 CA 95064

10 <sup>2</sup>Department of Biomedical Sciences, College of Medicine, Florida State University,  
11 Tallahassee, FL 32306

12 <sup>3</sup>Department of Chemistry and Biochemistry, University of California San Diego, La Jolla, CA  
13 92093

14 <sup>4</sup>Program in Cancer and Stem Cell Biology, Duke-NUS Medical School, Singapore, 169857

15 <sup>5</sup>Department of Entomology and Nematology, University of California Davis, Davis, CA 95616

16 <sup>6</sup>Department of Pharmacology, University of California San Diego, La Jolla, CA 92093

17 <sup>7</sup>Department of Pediatrics, Duke University Medical Center, Durham, NC 27710

18 <sup>8</sup>Center for Circadian Biology, University of California San Diego, La Jolla, CA 92093

19 <sup>‡</sup>Current address: D.E. Shaw Research, New York, NY 10036

20 <sup>9</sup>Lead contact

21 \*Correspondence: [cpartch@ucsc.edu](mailto:cpartch@ucsc.edu), [choogon.lee@med.fsu.edu](mailto:choogon.lee@med.fsu.edu)

## 1 **Summary**

2 PERIOD (PER) and Casein Kinase 1 $\delta$  regulate circadian rhythms through a phosphoswitch that  
3 controls PER stability and repressive activity in the molecular clock. CK1 $\delta$  phosphorylation of  
4 the Familial Advanced Sleep Phase (FASP) serine cluster embedded within the Casein Kinase  
5 1 binding domain (CK1BD) of mammalian PER1/2 inhibits its activity on phosphodegrons to  
6 stabilize PER and extend circadian period. Here, we show that the phosphorylated FASP region  
7 (pFASP) of PER2 directly interacts with and inhibits CK1 $\delta$ . Co-crystal structures in conjunction  
8 with accelerated molecular dynamics simulations reveal how pFASP phosphoserines dock into  
9 conserved anion binding sites near the active site of CK1 $\delta$ . Limiting phosphorylation of the  
10 FASP serine cluster reduces product inhibition, decreasing PER2 stability and shortens  
11 circadian period in human cells. We found that *Drosophila* PER also regulates CK1 $\delta$  via  
12 feedback inhibition through the phosphorylated PER-Short domain, revealing a conserved  
13 mechanism by which PER phosphorylation near the CK1BD regulates CK1 kinase activity.

## 1 Introduction

2           The mammalian circadian clock is driven by a set of interlocked transcription-translation  
3 feedback loops (TTFLs) (Takahashi, 2017). The core feedback loop is driven by the  
4 heterodimeric transcription factor, CLOCK:BMAL1, that promotes the transcription of multiple  
5 clock-controlled genes including its own repressors, Period (PER) and Cryptochrome (CRY)  
6 (Koike et al., 2012). PER proteins nucleate formation of a complex with CRYs and the clock-  
7 associated kinase, Casein Kinase 1  $\delta/\epsilon$  (CK1) (Aryal et al., 2017; Lee et al., 2001; Michael et al.,  
8 2017) that ultimately bind to and inhibit CLOCK:BMAL1 activity (Cao et al., 2021), so the relative  
9 abundance of PER proteins is tightly regulated (Chen et al., 2009; Lee et al., 2011b) by  
10 transcriptional, post-transcriptional, and post-translational mechanisms (Crosby and Partch,  
11 2020). The abundance of PER proteins is critical, as constitutive overexpression of PER  
12 proteins disrupts circadian rhythms (Chen et al., 2009) while the inducible regulation of PER  
13 expression on a daily basis can establish circadian rhythms *de novo* with tunable periods  
14 (D'Alessandro et al., 2015).

15           The post-translational control of PER stability by its cognate kinase, CK1, has been  
16 widely studied. CK1 remains stably bound, or anchored, to PER1 and PER2 throughout the  
17 circadian cycle (Aryal et al., 2017; Lee et al., 2001) via a conserved Casein Kinase 1 Binding  
18 Domain (CK1BD) (Eide et al., 2005; Lee et al., 2004). CK1 regulates PER2 stability through a  
19 phosphoswitch mechanism, whereby the anchored kinase phosphorylates antagonistic sites on  
20 PER2 that, on balance, control its stability (Zhou et al., 2015). CK1 phosphorylation of a Degron  
21 located several hundred residues upstream of the CK1BD, near the tandem PAS domains of  
22 PER2, leads to recruitment of the E3 ubiquitin ligase,  $\beta$ -TrCP, and subsequent proteasomal  
23 degradation (Eide et al., 2005; Masuda et al., 2020; Ohsaki et al., 2008; Vanselow et al., 2006).  
24 Activity at this PAS-Degron is counteracted somehow by CK1-dependent phosphorylation of a  
25 multiserine cluster within the CK1BD known as the FASP region. This region is named for a Ser  
26 to Gly polymorphism in human *Per2* (S662G) that disrupts CK1 activity at this cluster

1 (Narasimamurthy et al., 2018), destabilizing PER2 and shortening circadian period, leading to  
2 Familial Advanced Sleep Phase Syndrome (Toh et al., 2001) that impacts the timing of sleep  
3 onset in humans (Jones et al., 2013). Mutations in CK1 can also alter the balance of its activity  
4 on these two regions to significantly shorten circadian period *in vivo* (Lowrey et al., 2000; Xu et  
5 al., 2005; Xu et al., 2007).

6         Similar to the FASP region of mammalian PER1/2, phosphorylation of the PER-Short  
7 domain of *Drosophila* PER (dPER) by DOUBLETIME (DBT, the *Drosophila* homolog of CK1 $\delta/\epsilon$ )  
8 and NEMO/NLK attenuates DBT-dependent phosphorylation at an N-terminal Degron to  
9 stabilize dPER and regulate circadian period (Chiu et al., 2011; Chiu et al., 2008). In particular,  
10 DBT-dependent phosphorylation of S589, the site of the classic *per<sup>S</sup>* mutation (S589N) within  
11 the PER-Short domain (Konopka and Benzer, 1971), stabilizes PER in its inhibition-active form  
12 while mutation of this residue is sufficient to destabilize PER and shorten circadian period (Top  
13 et al., 2018). Phosphorylation of S596 by the NEMO/NLK kinase is required for DBT-dependent  
14 phosphorylation of nearby sites within the PER-Short domain, including S589, suggesting a  
15 hierarchical phosphorylation program that acts as a time-delay in the regulation of dPER  
16 abundance and repressive activity (Chiu et al., 2011).

17         In this study, we discovered how CK1 phosphorylation of the stabilizing FASP or PER-  
18 Short domains leads to feedback inhibition of the kinase. First, we found that multisite  
19 phosphorylation of the human PER2 FASP region is gated by rate-limiting phosphorylation of  
20 the first of five sequential serines in the FASP cluster by CK1. After this slow priming, CK1  
21 rapidly phosphorylates the remaining serines in the FASP cluster following an ordered-  
22 distributive kinetic mechanism. Phosphorylation of C-terminal sites within the FASP region leads  
23 to product inhibition of CK1, reducing the overall rate of priming phosphorylation. Consistent  
24 with this, we show that phosphorylated FASP (pFASP) peptides inhibit CK1 activity on the PAS-  
25 Degron *in vitro*. Crystal structures and molecular dynamics simulations of the pFASP-bound  
26 kinase reveal the mechanism of product inhibition, driven by the interaction between pFASP and

1 highly conserved anion binding sites on CK1. Leveraging newly developed U2OS *PER1<sup>Luc</sup>* and  
2 *PER2<sup>Luc</sup>* reporter cell lines (Park, 2022), we used CRISPR-generated indels to disrupt  
3 phosphorylation within the FASP region of *Per1* or *Per2*, observing shorter circadian periods  
4 and demonstrating conservation of the pFASP phosphoswitch in PER1 and PER2. Likewise, we  
5 discovered that phosphorylation of the PER-Short domain of *Drosophila* PER, located just  
6 upstream of the CK1BD, also inhibits CK1 activity *in vitro*. A structure of CK1 bound to a PER-  
7 Short domain phosphopeptide reveals a similar mechanism of product inhibition. Taken  
8 together, these results establish a conserved mechanism by which CK1 activity is regulated by  
9 feedback inhibition of PER to control PER stability and kinase activity within the molecular clock.

10

## 11 **Results**

### 12 **CK1 phosphorylates the serine cluster in the PER2 FASP region in a sequential manner**

13 The FASP region is an intrinsically disordered stretch of ~50 highly conserved residues  
14 embedded within the CK1BD of PER1 and PER2 that contains a cluster of 5 serine residues  
15 with the repeated spacing of SxxS (**Figure 1a**). We previously showed that CK1 is necessary  
16 and sufficient to initiate phosphorylation of the FASP region in mouse PER2 by targeting the first  
17 serine within this cluster in a rate-limiting step known as priming (Narasimamurthy et al., 2018).  
18 We sought to extend this analysis to study the mechanism of multisite phosphorylation within  
19 the intact human PER2 FASP region using an NMR-based kinase assay that provides site-  
20 specific resolution of kinase activity on an <sup>15</sup>N-labeled peptide substrate (Narasimamurthy et al.,  
21 2018; Smith et al., 2015). Using a constitutively active version of CK1δ lacking its autoinhibitory  
22 C-terminal tail, we found that CK1 phosphorylated all 5 serines within the FASP region (**Figure**  
23 **1b, Supplementary Figure 1a**). Based on the CK1 consensus recognition motif, pSxxS (Flotow  
24 et al., 1990), we expected that CK1 would phosphorylate serines downstream of the priming site  
25 in a sequential manner. To test this, we introduced alanine mutations at each successive serine  
26 within the FASP cluster and assayed CK1 activity in the NMR kinase assay (**Figure 1c-f**). As

1 expected, each Ser/Ala substitution selectively disrupted CK1 activity at downstream serines,  
2 confirming that the kinase acts in a sequential manner and generating a set of variably  
3 phosphorylated FASP peptides to study the functional consequences of kinase activity on this  
4 region.

5

## 6 **CK1 follows an ordered distributive mechanism gated by slow, non-consensus priming**

7       Due to the sequential nature of FASP phosphorylation by CK1, we propose that the  
8 kinase follows an ordered distributed kinetic mechanism (**Figure 2a**). The transient  
9 accumulation of intermediates can theoretically be observed by NMR, depending on the rate  
10 constants for intermediate states (**Figure 2b-c**) (Cordier et al., 2012). Since we previously  
11 determined that phosphorylation of the non-consensus priming serine was much slower than  
12 consensus-based activity on subsequent serines (Narasimamurthy et al., 2018), we expected  
13 that phosphorylation of the FASP would appear to be an all-or-none event by NMR, represented  
14 by state F in **Figure 2b**. When phosphorylation sites are in close proximity to one another, the  
15 chemical shift of a particular residue can change over the course of a reaction as nearby sites  
16 become modified (Smith et al., 2015). Using the distinct phosphospecies generated with alanine  
17 substitutions in the FASP, we were able to assign unique chemical shifts for each phosphopeak  
18 that arises as a function of sequential phosphorylation (**Supplementary Figure 1b**). However,  
19 in a kinase reaction with the native FASP, we did not observe accumulation of any intermediate  
20 states over the course of the reaction, only a set of peaks corresponding to the 5  
21 phosphoserines defined as species C in **Figure 2d** and **e**. We did observe a second slow step  
22 due to phosphorylation of T675 (peak 6D in **Figure 2d**) that was dependent on phosphorylation  
23 of the upstream residue S671 (**Supplementary Figure 1b**), consistent with the less optimal  
24 CK1 consensus motif of pSxxxS/T (Flotow et al., 1990). The peaks corresponding to  
25 phosphoserines 4 and 5 (pS671 and pS674) were split depending on whether or not T675 was  
26 phosphorylated (4C and 4D, 5C and 5D, **Figure 2d**).

1           We confirmed the overall kinetic scheme by collecting a series of 6-minute SoFast  
2   HMQC NMR spectra over the course of a 3-hr real-time kinase reaction in the magnet (**Figure**  
3   **2f**). Combining the total intensities for phosphoserines 4 and 5 from states C and D (**Figure 2g**)  
4   confirms that the reaction kinetics proceed as predicted by the model outlined in **Figure 2b**. To  
5   probe the ordered distributive mechanism, we utilized a mutant form of the kinase, K224D  
6   (Shinohara et al., 2017), that disrupts the anion binding pocket Site 1 near the active site  
7   thought to anchor primed substrates and facilitate kinase activity on downstream consensus  
8   sites (Longenecker et al., 1996; Venkatesan et al., 2019; Zeringo and Bellizzi, 2014). The  
9   K224D mutant retains its ability to prime the FASP region with kinetics similar to the WT kinase  
10   but has decreased activity on subsequent consensus-based sites (Philpott et al., 2020). By  
11   reducing the relative difference in rates for priming and sequential phosphorylation with this  
12   mutant, we were able to resolve a distinct peak corresponding to the transient accumulation of  
13   the primed, singly phosphorylated FASP, like that observed in the PER2 S665A mutant (**Figure**  
14   **2h**), which exhibited a clear lagging phase for kinase activity on subsequent phosphorylation  
15   sites (**Figure 2i**).

16           Mutation of the priming serine in the human FASP region to an aspartate, S662D,  
17   rescues downstream kinase activity within the FASP region (Toh et al., 2001) and increases  
18   circadian period by promoting the stabilization of PER2 in mice (Xu et al., 2007). Other CK1  
19   substrates are constitutively primed by D/E residues upstream that can act as phosphomimetics  
20   (Flotow and Roach, 1991; Marin et al., 2003). Using the NMR kinase assay, we observed that  
21   while the S662D mutation can prime kinase activity on downstream serines within the FASP  
22   region, it is a relatively poor mimetic of pS662, leading to a reduction in the overall kinase  
23   activity on the FASP peptide (**Supplementary Figure 1c-d**). Therefore, the ability of the S662D  
24   mutant to promote PER2 stability and period lengthening *in vivo* (Xu et al., 2007) likely rests on  
25   the weak but constitutive priming by the aspartate.

26

## 1 **Sequential phosphorylation of FASP leads to feedback inhibition of CK1**

2           Disrupting phosphorylation of the FASP region by mutating the priming serine increases  
3 CK1 activity at a phosphodegron in PER2 (Philpott et al., 2020), consistent with increased PER2  
4 turnover in the human FASPS S662G mutant (Toh et al., 2001). However, no mechanistic  
5 model has been robustly demonstrated yet for how FASP phosphorylation influences CK1  
6 activity. Monitoring both the loss of peak intensity for S662 and the concomitant increase in  
7 peak intensity for pS662, we made the striking observation that the fraction of primed WT FASP  
8 plateaued at approximately 50% completion over the course of a 3-hr real-time NMR kinase  
9 assay (**Figure 3a**). This suggested to us that some or all of the phosphoserines in the FASP  
10 cluster might work to reduce CK1 activity via feedback inhibition. To dissect the role of  
11 successive phosphoserines in this inhibition, we monitored the kinetics of FASP priming by  
12 NMR using the alanine-substituted mutants that limit the extent of sequential phosphorylation in  
13 a stepwise manner (**Figure 3b-e**). We found that reducing the extent of possible phosphosites  
14 in the FASP led to a stepwise increase in priming activity, resulting in near complete priming of  
15 the S668A mutant limited to just 2 phosphoserines (**Figure 3d**) and a several-fold increase in  
16 the rate of priming ( $k_{\text{prime}}$ ) relative to the WT FASP (**Figure 3f**).

17           To confirm that the observed inhibition of FASP priming was due to feedback inhibition,  
18 we performed substrate titration experiments using an ADP-Glo assay that measures bulk  
19 kinase activity. Here, we observed that WT FASP had the lowest overall rate of phosphorylation,  
20 despite having the most consensus-based phosphosites available for the kinase (**Figure 3e,g**).  
21 Moreover, kinase activity began to decrease on WT FASP at higher substrate concentrations,  
22 consistent with substrate/product inhibition. As in the NMR based assay, we observed a rank-  
23 order increase in overall kinase activity and decrease in apparent inhibition as the extent of  
24 possible phosphosites in FASP was successively limited with the alanine substitutions (**Figure**  
25 **3g**), shifting the Michaelis constant higher for each of these peptides (**Figure 3h**,  
26 **Supplementary Figure 2a**). Together, these data are consistent with the rapid generation of a



1 pFASP product that inhibits kinase activity in *trans*. To test this, we performed a kinase assay  
2 on a peptide corresponding to the PAS-Degron of PER2 (**Supplementary Figure 2b**) (Isojima  
3 et al., 2009) in the presence or absence of synthetically phosphorylated FASP peptides  
4 (pFASP). The doubly phosphorylated FASP peptide (2pFASP) inhibited the kinase in *trans*, with  
5 the 3pFASP peptide further increasing the potency of inhibition (**Figure 3i**). Addition of the  
6 4pFASP peptide in *trans* also inhibited phosphorylation of the priming serine in an *in vitro* kinase  
7 assay, where full-length mouse PER2 immunoprecipitated from HEK293 cells was  
8 dephosphorylated *in vitro* and then treated with CK1 $\delta$  kinase that had been pre-incubated with  
9 4pFASP peptide (**Figure 3j-k**).

10 We performed real-time bioluminescence measurements of HEK293T cells transiently  
11 transfected with hPER2::LUC and CK1 $\delta$  expression plasmids to monitor the half-life of  
12 hPER2::LUC in the context of Ser/Ala mutations that modulate PER2 phosphorylation.  
13 Consistent with prior results, mutation of the PAS-Degron site (S480) to an alanine increased  
14 hPER2::LUC stability (**Supplementary Figure 2c**), where S480 corresponds to the first  
15 phosphorylated residue of the  $\beta$ -TrCP consensus recognition motif, DpSGYGpS  
16 (**Supplementary Figure 2b**) (Eide et al., 2005; Reischl et al., 2007; Wu et al., 2003). Mutation  
17 of either the priming serine (S662A) or downstream serines (i.e., S671A or S674A) decreased  
18 PER2::LUC half-life, while mutation of the threonine residue at the end of the FASP cluster  
19 (T675A) showed no significant effect on PER2 stability (**Supplementary Figure 2c**). To further  
20 link the Ser/Ala mutations in FASP to  $\beta$ -TrCP recognition of PER2, we performed co-  
21 immunoprecipitation experiments from HEK293T cells co-transfected with PER2,  $\beta$ -TrCP and  
22 CK1 $\delta$  expression plasmids and observed increased CK1 $\delta$ -dependent  $\beta$ -TrCP binding to PER2  
23 with mutants that reduce FASP phosphorylation (**Supplementary Figure 2d**).

24

25 **pFASP binds to CK1 via conserved anion binding sites to occlude the substrate binding**  
26 **cleft**

1 CK1 has several highly conserved anion binding sites located around the substrate  
2 binding cleft (**Figure 4a**) (Longenecker et al., 1996; Philpott et al., 2020). Given their location  
3 and the distance between phosphosites within pFASP, we hypothesized that these anion  
4 binding sites might mediate interaction of the phosphorylated peptide with CK1. To test this  
5 prediction, we solved crystal structures of phosphorylated FASP peptides bound to the catalytic  
6 domain of CK1 $\delta$  (**Table 1**). Indeed, in three distinct complexes with 2pFASP, 3pFASP, or  
7 4pFASP peptides, we observed a consistent binding mode (**Supplementary Figure 3a-b**) with  
8 the phosphorylated peptides coordinating the two anion binding sites (Site 1 and Site 2) to fully  
9 occlude the substrate binding cleft (**Figure 4b**). Interestingly, a substrate motif analysis derived  
10 from a dataset of 101 known CK1 $\delta$  substrate sequences from PhosphoSitePlus aligns well with  
11 this pFASP binding mode, suggesting that the first 3 sites of the FASP region conform to an  
12 ideal CK1 $\delta$  recognition sequence (**Supplementary Figure 3c**). In Site 1, R178 and the  
13 backbone amide of G215 coordinate pS662 of the pFASP peptide (**Figure 4c**). Site 1 harbors  
14 the location of the *tau* mutation (R178C) that shortens circadian period (Lowrey et al., 2000).  
15 We did not observe strong density for K224, the other basic residue that could coordinate an  
16 anion in Site 1, suggesting flexibility in the Fa helix consistent with previous studies (Cullati et  
17 al., 2022; Philpott et al., 2020; Shinohara et al., 2017). Moving down the pFASP peptide, we  
18 observed additional backbone-backbone interactions and docking of the pFASP side chains of  
19 V663 & A664 into small hydrophobic pockets within the substrate binding cleft (**Figure 4b, d**).

20 The 2<sup>nd</sup> phosphoserine of pFASP, pS665, projected into the active site of CK1,  
21 positioned close to where the gamma phosphate would be in ATP-bound CK1 (**Supplementary**  
22 **Figure 3e**). We also observed that S19 of the N-terminal lobe P-loop of CK1 clamped down on  
23 pS665, suggesting a stabilizing mechanism for transfer of phosphate from the nucleotide to the  
24 substrate, with the +1 Leu after pS665 fitting into a small hydrophobic pocket on the kinase. As  
25 previously noted, this small hydrophobic pocket is formed between L173 and Y225 of CK1 (the  
26 +1 pocket, **Figure 4b, d**) in the downward conformation of the CK1 activation loop (Philpott et

1 al., 2020). The +1 pocket is just large enough to accommodate small residues such as Ala, Leu,  
2 or Val, and could contribute to CK1 recognition of the non-consensus SLS motif (Marin et al.,  
3 2003) or the FASP priming site, where the +1 residue is a valine.

4 Moving towards the C-terminal end of the peptide, the 3<sup>rd</sup> phosphoserine of pFASP,  
5 pS668, is coordinated by anion binding Site 2, comprising basic residues R127, K154, and K171  
6 (**Figure 4e**). R127 is part of the conserved HRD motif involved in the regulation of Ser/Thr  
7 kinases by coordinating a phosphorylated residue within the activation loop (Nolen et al., 2004).  
8 To further validate the significance of these anion binding sites in the binding of pFASP and  
9 product inhibition, we introduced charge inversion mutations in Site 1 (K224D) or Site 2 (R127E)  
10 and performed substrate titrations with FASP peptide, observing a decrease in the level of  
11 product inhibition (**Supplementary Figure 3d**).

12 The highly specific sequential mechanism of FASP phosphorylation also strongly  
13 suggests that the FASP peptide translates through the substrate binding cleft, with each  
14 phosphoserine anchoring into Site 1 to facilitate the next phosphorylation event in the active  
15 site. The phosphorylated serines in pFASP all share the same approximate atomic distance  
16 between each other that is consistent with the spacing between Site 1, the active site, and Site  
17 2. Therefore, product inhibition may continue to increase as a function of sequential  
18 phosphorylation at least partially due to changes in entropy, where 3pFASP can occupy each of  
19 the aforementioned sites on the kinase in one way (1 microstate), 4pFASP in two ways (2  
20 microstates), and 5pFASP in three ways (3 microstates) (**Supplementary Figure 3f**).

21 The *tau* mutation in Site 1 of CK1 $\delta$  prevents anion coordination at this site and alters the  
22 global dynamics of CK1 as well as significantly changing the local dynamics in and around the  
23 activation loop and Site 2 via an allosteric mechanism (Philpott et al., 2020). We note that the  
24 alternate conformation of the activation loop stabilized in the *tau* mutant sterically clashes with  
25 the 3pFASP binding mode (**Figure 4f**). This incompatibility suggests that the *tau* mutant is less  
26 susceptible to feedback product inhibition, perhaps also contributing to the increased

1 phosphorylation of the PAS-Degron and degradation of PER2 by this kinase mutant (Gallego et  
2 al., 2006a; Philpott et al., 2020; Zhou et al., 2015).

3

#### 4 **Molecular dynamics simulations support stable binding mode of pFASP:CK1 crystal** 5 **structures**

6 To investigate how CK1 might be inhibited by a fully phosphorylated FASP peptide, we  
7 modeled and simulated the interaction of CK1 and a 5pFASP peptide using Gaussian  
8 accelerated Molecular Dynamics (details in Supplementary Material) (Miao et al., 2015). We  
9 found that the first three phosphoserines (pS662, pS665, and pS668) remain stably bound in  
10 the substrate binding cleft of CK1, while the 4<sup>th</sup> and 5<sup>th</sup> phosphoserines (pS671 and pS674)  
11 display higher mobility (**Figure 5a-b**). As expected, pS662 forms stable electrostatic interactions  
12 in Site 1 (**Figure 5c**). In addition to being close to R178 and K224, pS662 also engages in  
13 stable electrostatic interactions with Q214, located in the highly flexible loop-EF (Cullati et al.,  
14 2022; Shinohara et al., 2017). In the active site, pS665 is locked in place by a cluster of  
15 electrostatic interactions involving D128, K130, D148 and a Na<sup>+</sup> ion (**Figure 5d**). The presence  
16 of this ion in the active site suggests that at least one cation (likely Mg<sup>2+</sup>) could be important for  
17 product inhibition. The third phosphoserine (pS668) is held in place in Site 2 by stable  
18 electrostatic interactions with R127, K154, K171, and, to a lesser extent, R168 (**Figure 5e**).  
19 Finally, we found that the 5<sup>th</sup> phosphoserine (pS674) often engages in electrostatic interactions  
20 with R160 (close to anion binding Site 3, which precedes the activation loop) and with K155 (just  
21 after the DFG motif) (**Figure 5l**). We refer to this herein as Site 3'. These interactions provide  
22 additional product stabilization, perhaps contributing to stronger inhibition when the FASP  
23 region is fully phosphorylated.

24

25 **Circadian rhythms are shortened by small deletions in the conserved FASP region of**  
26 **PER**

1 To address the regulatory role of the FASP region on circadian period, small amino acid  
2 deletions were introduced in the human *Per2* FASP region encoded by exon 17 (E17) by  
3 targeting the priming serine (S662) with CRISPR (**Figure 6a**). This CRISPR-mediated strategy  
4 utilized human U2OS cells with endogenous *Per2-luc* and *Per1-luc* knock-in reporter genes that  
5 produced robust rhythms in bioluminescence and clock proteins (Park, 2022). As out-of-frame  
6 mutations would disrupt LUC expression and eliminate bioluminescence, we could select for  
7 small in-frame deletions in PER2::LUC protein based on intact bioluminescence signals followed  
8 by molecular characterization. Small in-frame deletions that removed the priming serine led to  
9 rhythms in PER2::LUC abundance that were phase-advanced relative to WT PER2::LUC after  
10 synchronization by serum shock (**Figure 6b**). Additionally, PER1 also showed phase-advanced  
11 rhythms in abundance in these mutant lines relative to the parental cell line (**Supplementary**  
12 **Figure 4a**).

13 Immunoblots for priming-disrupted PER2 mutants showed similar levels of gross  
14 phosphorylation as WT PER2::LUC (**Figure 6c-d, Supplemental Figure 4b**). To quantify  
15 differences in period, real-time bioluminescence measurements were collected on the clonal cell  
16 lines, which exhibited robust circadian rhythms with a significantly shorter period relative to the  
17 parental cell line (**Figure 6e, Supplemental Figure 4c**). Mutants that left the priming serine  
18 intact but removed one or more of the downstream serines (i.e., P2E17-25) also showed robust  
19 rhythms in bioluminescence with short periods (**Figure 6f**), but they were not as short as the  
20 priming-disrupted mutants that eliminate all FASP phosphorylation ( $P < 0.05$ ). This suggests a  
21 role for the downstream phosphorylation sites in regulation of CK1 activity on PER2. Disruption  
22 of the FASP region led to decreased stability of PER2 after treatment with cycloheximide  
23 (**Figure 6g**) and also exhibited accelerated phosphorylation kinetics relative to WT, based on  
24 mobility shift, on the *de novo* PER2 synthesized after washout of cycloheximide (**Figure 6h**).  
25 The FASP region is highly conserved in PER1, and similar CRISPR-mediated edits to the PER1  
26 FASP region by targeting the priming serine S714 also exhibited short period rhythms

1 characterized by destabilized PER1 (**Supplemental Figure 5a-f**). NMR studies of the human  
2 PER1 FASP demonstrate that CK1 phosphorylates it similarly to PER2 and that indels  
3 disrupting the priming serine eliminate kinase activity on the region (**Supplemental Figure 5g**),  
4 demonstrating that the phosphorylated FASP region of both mammalian PERs likely act in a  
5 similar manner to constrain CK1 activity.

6

### 7 **The phosphorylated *Drosophila* PER-Short region binds CK1 to inhibit kinase activity**

8 Mammalian and *Drosophila* PER proteins both possess the two conserved motifs  
9 comprising the CK1 binding domain (CK1BD) that stably anchors the kinase to PER throughout  
10 its daily life cycle (Eide et al., 2005; Kim et al., 2007; Kivimae et al., 2008; Nawathean et al.,  
11 2007) (**Figure 7a-b**). Phosphorylation of S589 on dPER by the *Drosophila* CK1 homolog DBT  
12 reduces kinase activity at a phosphodegron upstream to increase dPER stability and lengthen  
13 circadian period (Chiu et al., 2011; Kivimae et al., 2008) in a manner similar to the FASP-  
14 associated S662 on human PER2 (Toh et al., 2001) (**Figure 7a**). Loss of this phosphorylation  
15 site with the classic *per-Short* mutation (Konopka and Benzer, 1971) (*per<sup>S</sup>*, S589N) or other  
16 mutants nearby in the PER-Short domain result in predominantly short period phenotypes  
17 (Baylies et al., 1992; Chiu et al., 2011; Rothenfluh et al., 2000; Rutila et al., 1992). Because this  
18 CK1-dependent phosphosite is in close proximity to the CK1BD (**Figure 7c**) (Kim et al., 2007;  
19 Lee et al., 2004; Nawathean et al., 2007), we wondered if it would work similarly to the FASP  
20 region to attenuate CK1 activity. Phosphorylation of S589 by CK1 (i.e., DBT) has been invoked  
21 as a potential mechanism by which dPER could control CK1 activity in *trans* to regulate dPER  
22 turnover and repressive activity (Chiu et al., 2011; Chiu et al., 2008; Kivimae et al., 2008; Top et  
23 al., 2018). Phosphorylation of S589 is preceded *in vivo* by phosphorylation of S596 by NEMO  
24 kinase, and the S596A mutation eliminates phosphorylation of S589, suggesting a hierarchical  
25 regulation of the PER-Short region by multiple kinases (Chiu et al., 2011).

1 To determine if the phosphocluster in the PER-Short domain regulates CK1 activity on  
2 the N-terminal dPER Degron, we examined the progressive phosphorylation of this region in  
3 *Drosophila* S2 cells using a full-length dPER construct that contains a TEV-cleavable 100-  
4 residue N-terminal fragment encompassing the Degron (PER/T100) (Chiu et al., 2011; Chiu et  
5 al., 2008). PER/T100 was co-expressed with full length dPER or a C-terminal fragment  
6 containing the kinase binding domain (residues 560-1034), with or without the S596A mutant,  
7 along with an inducible DBT construct. We observed that inhibition of dPER Degron  
8 phosphorylation is lost with the S596A mutant in full-length dPER (**Figure 7d, f**) or a fragment of  
9 dPER containing just the kinase binding domain in *trans* (**Figure 7e, f**). To test for direct  
10 inhibition of CK1 activity by the phosphorylated PER-Short domain, we also performed kinase  
11 assays *in vitro* using the human CK1 $\delta$  kinase domain and a PER2 PAS-Degron substrate in the  
12 presence of unphosphorylated and phosphorylated dPER-Short peptides (**Figure 7g**). CK1  
13 phosphorylates only S589 in this peptide *in vitro* (Kivimae et al., 2008), although it is dependent  
14 upon NEMO kinase phosphorylation of S596 *in vivo* (Chiu et al., 2011). Here, we observed that  
15 peptides containing pS589, pS596, or both pS589/pS596 inhibited CK1 kinase activity similarly  
16 to the 3pFASP peptide (**Figure 7g**).

17 We then sought to characterize the structural basis for this inhibition with a crystal  
18 structure of CK1 in complex with the pS589 dPER-Short domain peptide (**Figure 7g-h**). This  
19 structure revealed a binding mode similar to the pFASP, where the substrate binding cleft was  
20 largely occluded by the peptide (**Figure 7h**) and anchored by the coordination of pS589 at anion  
21 binding Site 1 (**Figure 7i**). However, the activation loop of the kinase took on the rare 'loop up'  
22 conformation in this complex, which disrupts the second anion binding pocket (Philpott et al.,  
23 2020). This alternate conformation exposes a new channel that runs from the active site down  
24 towards the bottom of the kinase between the activation loop and helix-F that is bound by the  
25 dPER-Short peptide (**Figure 7h**), constricting at its narrowest point around dPER residue G593.  
26 We did not have density for residues after 595, including for pS596 in structures solved with the

1 doubly phosphorylated peptide (data not shown). Therefore, although both mammalian and  
2 *Drosophila* PER peptides dock a critical CK1-dependent phosphoserine into anion binding Site  
3 1, changes in peptide binding along the kinase active site suggest different mechanisms of  
4 recognition used to bind and inhibit the kinase.

5

## 6 **Discussion**

7       The CK1 kinase family is defined by several highly conserved anion binding sites located  
8 around the substrate binding cleft that regulate kinase dynamics, substrate specificity, and  
9 temperature compensation of circadian rhythms (Lowrey et al., 2000; Philpott et al., 2020;  
10 Shinohara et al., 2017). It has long been proposed these anion binding sites mediate the  
11 recruitment of phosphorylated substrates to prime activity on the CK1 consensus motif pSxxS  
12 and/or bind the autophosphorylated tail of the kinase to inhibit its activity (Graves and Roach,  
13 1995; Longenecker et al., 1996). Here, we show that CK1-dependent phosphorylation of key  
14 regulatory sites on its substrate PER near the kinase anchoring domain leads to feedback  
15 inhibition of the kinase through these conserved anion binding sites. Anchoring interactions can  
16 significantly enhance the kinetics of kinase activity on low to moderate affinity substrates nearby  
17 (Dyla et al., 2022), as was recently demonstrated for CK1 and its activity on low affinity, non-  
18 consensus phosphorylation sites on PER and FRQ (Marzoll et al., 2022). Inhibition of CK1  
19 activity by phospho-PER is conserved in both mammals and *Drosophila* through anion binding  
20 Site 1, although other details of the PER-inhibited kinase complex differ by species. Notably, the  
21 loss of these CK1-dependent phosphosites in *Drosophila* (Konopka and Benzer, 1971), mice  
22 (Xu et al., 2007), and humans (Toh et al., 2001) shortens circadian period by several hours *in*  
23 *vivo*, demonstrating the functional importance of CK1 feedback inhibition on the molecular clock.

24       NMR spectroscopy allowed us to probe the kinetics and mechanism of the progressive,  
25 sequential phosphorylation of the FASP region in human PER proteins by CK1. The sequential  
26 nature of kinase activity here suggests that targeting the initial, rate-limiting priming step at the



1 FASP region could be a powerful way to influence circadian rhythms. In fact, CK1 activity is  
2 influenced by other post-translational modifications on or around the FASP priming site, such as  
3 O-GlcNAcylation (Durgan et al., 2011; Kaasik et al., 2013) and acetylation (Levine et al., 2020),  
4 demonstrating how this region is poised to integrate different metabolic signaling inputs for  
5 control over the clock. Our data suggest that CK1 inhibition by the human PER2 pFASP region  
6 depends on similar spacing between successive phospho-serines on the FASP and the  
7 distance between anion coordination sites in the substrate binding region of CK1. Although the  
8 structures of inhibited CK1 illustrate a common binding mode for the first three phosphorylation  
9 sites of the FASP region, deletion of downstream phosphorylation sites in the U2OS *Per1* and  
10 *Per2* indel cell lines demonstrates that they also contribute to kinase inhibition and period  
11 control as suggested by our molecular dynamics simulations.

12 The CK1-dependent site in the *Drosophila* PER-Short domain (pS589) bound to the  
13 kinase at Site 1, similar to the priming serine of the human pFASP (pS662), although a change  
14 in the conformation of the kinase activation loop created a new peptide-binding channel that led  
15 the dPER peptide down toward the bottom of the kinase. We could not visualize density for the  
16 peptide after residue 595 in our structure, but substitution of dPER residues G593 or P597 also  
17 phenocopies the *per<sup>S</sup>* mutation (S589N) (Baylies et al., 1992; Konopka and Benzer, 1971),  
18 suggesting that they also contribute to binding and feedback regulation of the kinase.  
19 Furthermore, we observed that phosphorylation of S596, either alone or in combination with  
20 S589, enhanced inhibition of CK1 by the PER-Short domain peptide *in vitro*, indicating that  
21 additional interactions between the C-terminal half of the PER-Short domain and CK1 may have  
22 been occluded by crystal packing.

23 Despite a high degree of similarity between the kinases, expressing mammalian CK1  
24 variants in *Drosophila* does not always recapitulate their effects on circadian period (Fan et al.,  
25 2009; Sekine et al., 2008; Venkatesan et al., 2019; Xing et al., 2017; Xu et al., 2005). This could  
26 be due to differences in substrate identity or accessibility given changes in the molecular

1 architecture of mammalian and *Drosophila* clocks (Patke et al., 2020). However, the differences  
2 we observed in the mechanism of CK1 feedback inhibition by human and *Drosophila* PER may  
3 contribute to these functional differences as well. In addition to this, allosteric links between  
4 anion binding Site 1 and Site 2 in human CK1 profoundly influence the structural dynamics of  
5 the activation loop (Philpott et al., 2020) and it is not yet known if the DBT kinase domain  
6 exhibits similar dynamics.

7 Molecular mechanisms that regulate the stable association between PER-CK1, PER  
8 stability, and repressive activity appear to be broadly conserved across eukaryotes. Notably, the  
9 CK1 binding motifs are conserved in PER homologs from mammals (Eide et al., 2005; Lee et  
10 al., 2004), *Drosophila* (Kim et al., 2007; Nawathean et al., 2007) and *C. elegans* (Jeon et al.,  
11 1999), and there is functional conservation with the two helical motifs (FCD1/2) that constitute  
12 the CK1 interaction domain in *Neurospora* FRQ (He et al., 2006; Liu et al., 2019). CK1 mediates  
13 the repressive activity of PER in the mammalian clock, where cryptochromes facilitate the  
14 recruitment of PER1/2-CK1 to the transcription factor CLOCK:BMAL1 in the nucleus, leading to  
15 its phosphorylation and displacement from DNA early in the repressive phase (Cao et al., 2021;  
16 Chiou et al., 2016). Similar mechanisms of displacement-type repression are also found in  
17 *Drosophila* (Patke et al., 2020) and *Neurospora* (He et al., 2006) circadian clocks. These  
18 mechanisms generally depend on CK1 activity and the strength of kinase anchoring (Cao et al.,  
19 2021; Liu et al., 2019), although DBT catalytic activity may not be required for displacement-  
20 type repression in *Drosophila* (Yu et al., 2009). Our data suggest a model whereby  
21 phosphorylation of key regulatory sites in PER close to the CK1BD results in feedback inhibition  
22 of CK1, thereby directly regulating the ability of CK1 to phosphorylate PER and possibly other  
23 substrates within the circadian clock.

24 It is not yet clear where in the cell and when in the ~24-hr cycle of the molecular clock  
25 that regulation of CK1 activity by the PER pFASP/Per-Short domain occurs. In mammals,  
26 PER1/2 form stable complexes with CRY1/2 and CK1 in the cytoplasm (Aryal et al., 2017),

1 although PER proteins remain largely hypophosphorylated until after nuclear entry (Beesley et  
2 al., 2020; Lee et al., 2001). PER phosphorylation is counterbalanced by phosphatases in  
3 mammals (Gallego et al., 2006b; Lee et al., 2011a; Schmutz et al., 2011) and *Drosophila*  
4 (Sathyanarayanan et al., 2004), so further work will be necessary to determine how kinase and  
5 phosphatase activity are integrated with other post-translational modifications to regulate  
6 FASP/PER-Short phosphorylation and influence feedback regulation of CK1 activity.

7

## 8 **Acknowledgements**

9 We thank the staff at the 23-ID-D beamline at the Advanced Photon Source of the Argonne  
10 National Lab for their help with data collection. Funding for this work was provided by the US  
11 National Institutes of Health grants R01 GM107069 and R35 GM141849 (to C.L.P.), R01  
12 GM131283 (to C.L.), R01 DK124068 (to J.C.C.), R01 GM31749 (to J.A.M.), and Singapore  
13 Ministry of Health grant MOH-000600 to D.M.V. S.R.H. was supported by NIH fellowship F32  
14 GM133149.

15

## 16 **Author contributions**

17 Conceptualization: J.M.P., S.R.H., C.L., and C.L.P.; Software: C.G.R. and J.A.M.; Investigation:  
18 J.M.P., A.F.M., J.P., K.L., S.R.H., R.N., D.H.S., R.R., and J.C.C.; Formal Analysis: J.M.P.,  
19 A.M.F., S.R.H., R.N., Y.C., and S.T.; Writing – Original draft: J.M.P., C.G.R., C.L., and C.L.P.;  
20 Writing – Review & Editing: J.M.P., C.G.R., R.N., D.M.V., J.C.C., C.L., and C.L.P.; Visualization:  
21 J.M.P.; Supervision: J.A.M., D.M.V., J.C.C., C.L., and C.L.P.; Project Administration: C.L. and  
22 C.L.P.; Funding Acquisition: J.A.M., D.M.V., J.C.C., C.L., and C.L.P.

23

## 24 **Declaration of interests**

25 The authors declare no competing interests.

26

Figure 1

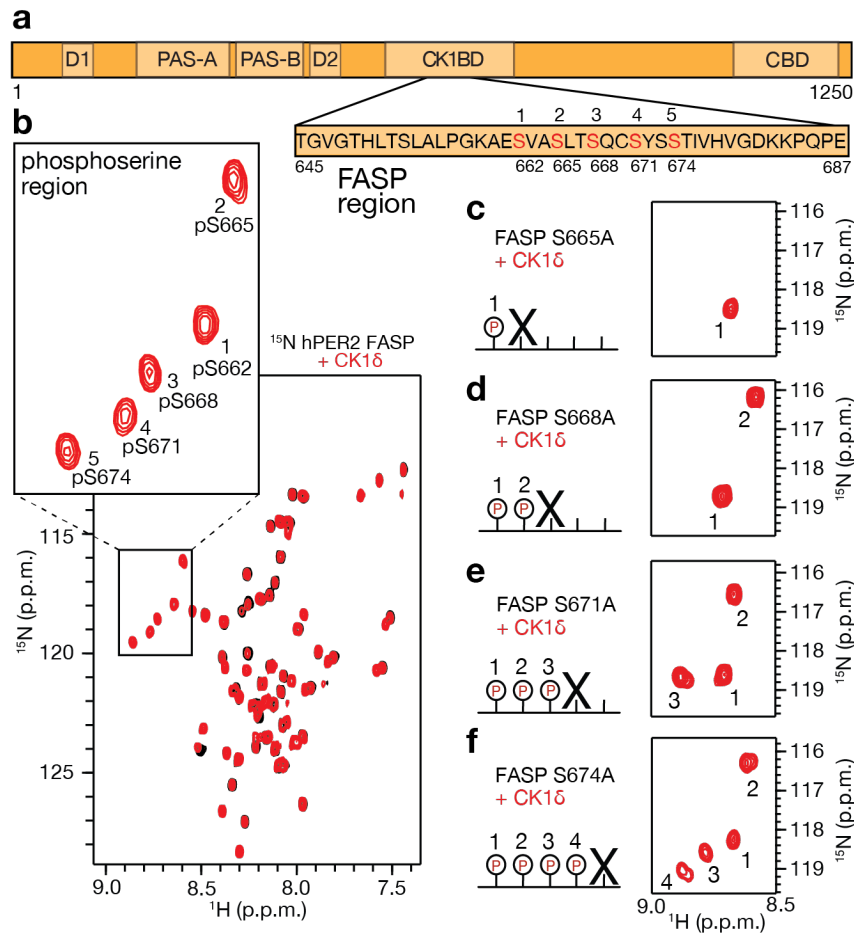

1

2 **Figure 1. CK1 phosphorylates the human PER2 FASP region sequentially.**

3 **a**, Domain map of hPER2 with tandem PAS domains, phosphodegrons (D1/D2), Casein Kinase

4 1 binding domain (CKBD), and CRY binding domain (CBD). Zoom, the FASP peptide used in

5 NMR assays with CK1 phosphorylation sites (red). **b**,  $^{15}\text{N}/^1\text{H}$  HSQC of 200  $\mu\text{M}$  hPER2 FASP

6 used for kinetic assays (black), overlaid with 16 hr timepoint in kinase assay (red).

7 Zoom/boxed region, the phosphoserine region. Numbering (1-5) corresponds to the order in the

8 FASP peptide. **c-f**, Schematic representation of Ser/Ala mutations introduced to the FASP

9 peptide. X, indicates position of the alanine substitution within the FASP serine cluster. Zoom of

10 phosphoserine region for the  $^{15}\text{N}/^1\text{H}$  HSQC of FASP mutants (red) at 3 hr timepoint in the kinase

11 assay, with numbering showing the sequential order of reaction.

12

Figure 2

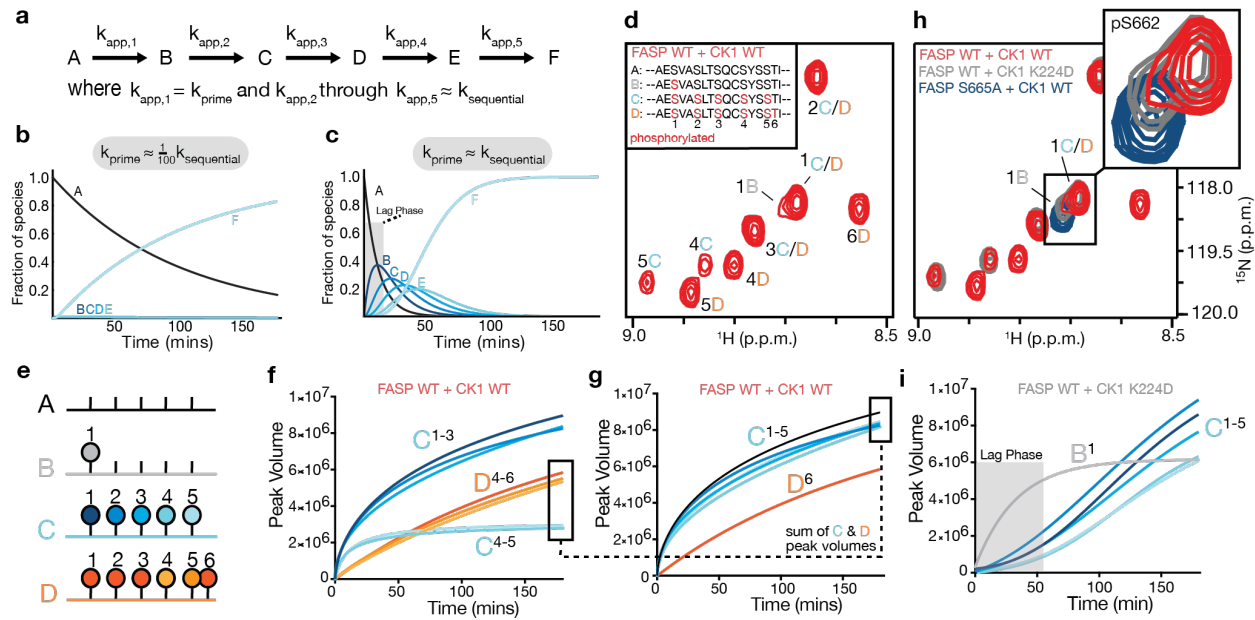

1

2 **Figure 2. CK1 follows an ordered distributive mechanism on the human PER2 FASP**

3 **region.**

4 **a**, Schematic of ordered distributive kinetic model used for panels **b** and **c** (modeled using

5 Wolfram Mathematica, see Supplement). **b**, Reaction coordinate for ordered distributive kinetic

6 mechanism with differential rates for priming and sequential kinase activity. **c**, Reaction

7 coordinate for ordered distributive kinetic mechanism with similar rates for priming and

8 sequential kinase activity. **d**, Zoom of  $^{15}\text{N}/^1\text{H}$  HSQC hPER2 FASP phosphoserine region looking

9 at peaks corresponding to different states arising from at 3 hr incubation with CK1 WT (red).

10 States A-D (inset) correspond to unique chemical shift states observed throughout the kinase

11 assay. **e**, Schematic of unique states A-D observed in **d**: A, unphosphorylated FASP; B, primed

12 FASP; C, all serines in FASP phosphorylated; D, all serines plus T675 phosphorylated.

13 Numbering indicates order of phosphorylation. **f**, Traces of accumulating peak volume from the

14 NMR kinase assay. Letters C-D with superscript numbers correspond to specific

15 phosphoserines observed in the NMR assay. **g**, Same traces as in **f**, with peak volumes

16 corresponding to states C and D for the last two serines (4-5) summed to show that all

1 phosphoserines in the FASP report on state C with similar kinetics. **h**, Phosphoserine region  
 2 showing unique chemical shift environment for singly phosphorylated (priming only) FASP  
 3 S665A (blue) overlaid with WT FASP with CK1 WT (red) or K224D (gray) after 3 hr incubation.  
 4 B-D lettering corresponds to unique states observed in NMR kinase assay as in **d**. **i**, Traces of  
 5 accumulating peak volume from NMR kinase assay with CK1 K224D, resolving the transient  
 6 accumulation of primed FASP and a clear lagging phase for subsequent phosphorylation states.  
 7

Figure 3

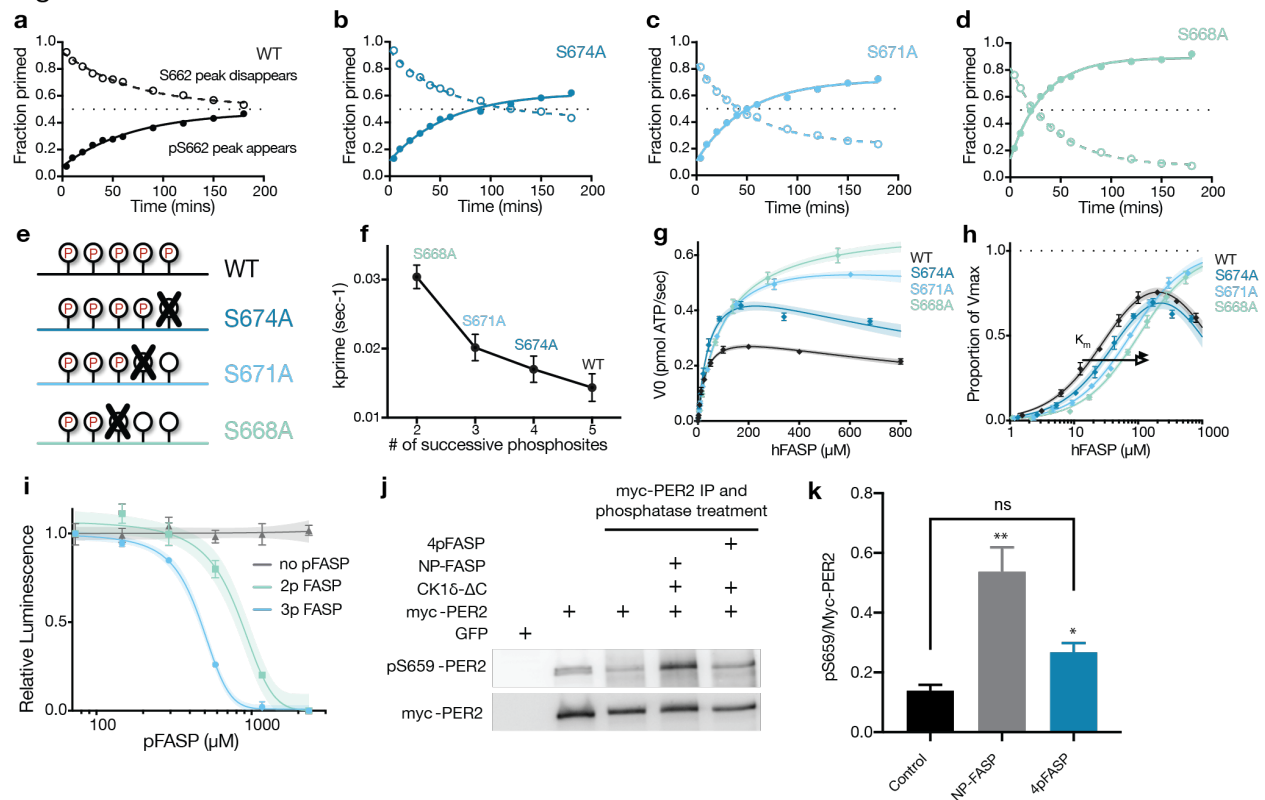

8  
 9 **Figure 3. Phosphorylation of the human PER2 FASP region inhibits CK1 activity.**  
 10 **a-d**, NMR kinase assay for the WT FASP or indicated mutant peptides monitoring the reaction  
 11 kinetics of priming phosphorylation at S662 by NMR. **e**, Schematic of FASP alanine mutations  
 12 and resulting discrete phosphostates. **f**, Plot of priming rate constant ( $k_{\text{prime}}$ ) as a function of the  
 13 possible successive phosphosites in the FASP. Error bars represent SEM from fits in panels **a-**  
 14 **d**. **g**, ADP-Glo kinase assay with titration of FASP mutant peptides with mean and SD from 2

1 replicates, representative of  $n = 3$  independent assays. Shaded area indicates 95% C.I. of the  
2 fit. **h**, Data from panel **f** normalized by  $V_{max}$  values calculated from the preferred kinetic model  
3 (see Supplementary Figure 2, Table 1). **i**, ADP-Glo kinase assay of hPER2 PAS-degron peptide  
4 (see Supplementary Figure 2b) with titration of pFASP peptides corresponding to 2 (2p) or 3  
5 (3p) phosphoserines (see Supplementary Figure 4c) with mean and SD from 2 replicates,  
6 representative of  $n = 3$  independent assays. Shaded area indicates 95% C.I. of the fit. **j-k**,  
7 Western blot and quantification of the phosphorylation of the FASP priming site (pS569 in  
8 mouse PER2). Full-length mouse PER2 was immunoprecipitated from transfected HEK293T  
9 cells, dephosphorylated, and subjected to an *in vitro* kinase assay with 200 ng CK1 in the  
10 presence and absence of added NP or 4pFASP peptides as indicated.

11

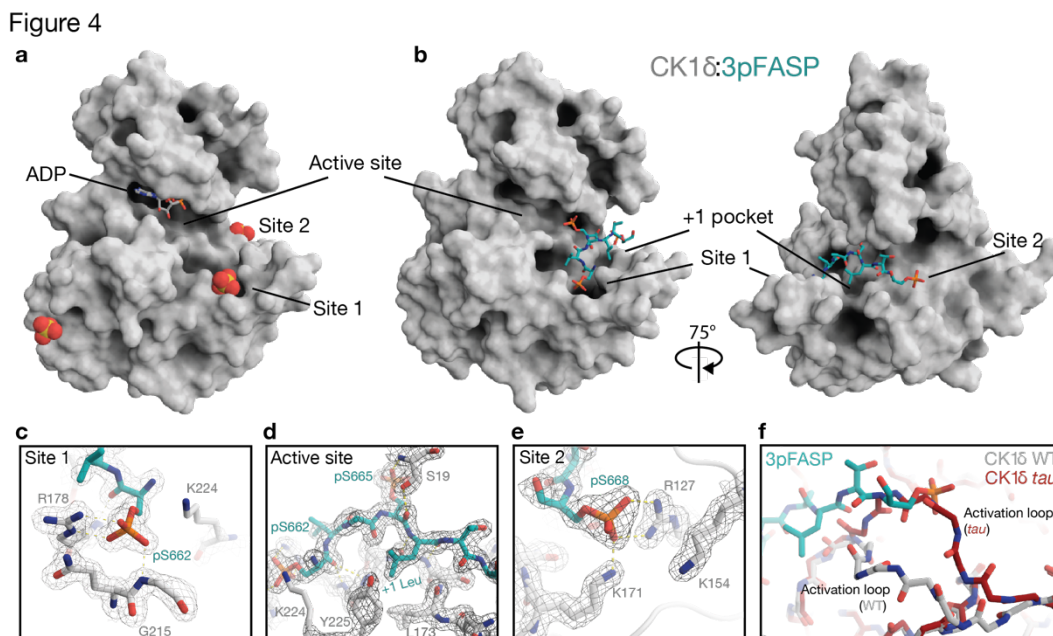

12

13 **Figure 4. The human PER2 pFASP binds to the active site of CK1.**

14 **a**, Surface representation of CK1 catalytic domain bound to ADP (PDB 5X17). Spheres, sulfate  
15 anions from the crystallization condition bound at anion binding sites as indicated. **b**, Surface  
16 representation of the CK1 catalytic domain bound to a 3pFASP peptide (see Supplementary  
17 Figure 4). **c**, Zoom of 3pFASP interactions within anion binding site 1. **d**, Zoom of 3pFASP

- 1 interactions within active site region. **e**, Zoom of 3pFASP interactions within anion binding site 2.  
 2 **f**, Structural alignment showing the main chain for the activation loop of CK1 WT (gray) and the  
 3 *tau* mutant (red) showing a clash of the 3pFASP (teal) with the conformation of the activation  
 4 loop stabilized by the *tau* mutation.  
 5

Figure 5

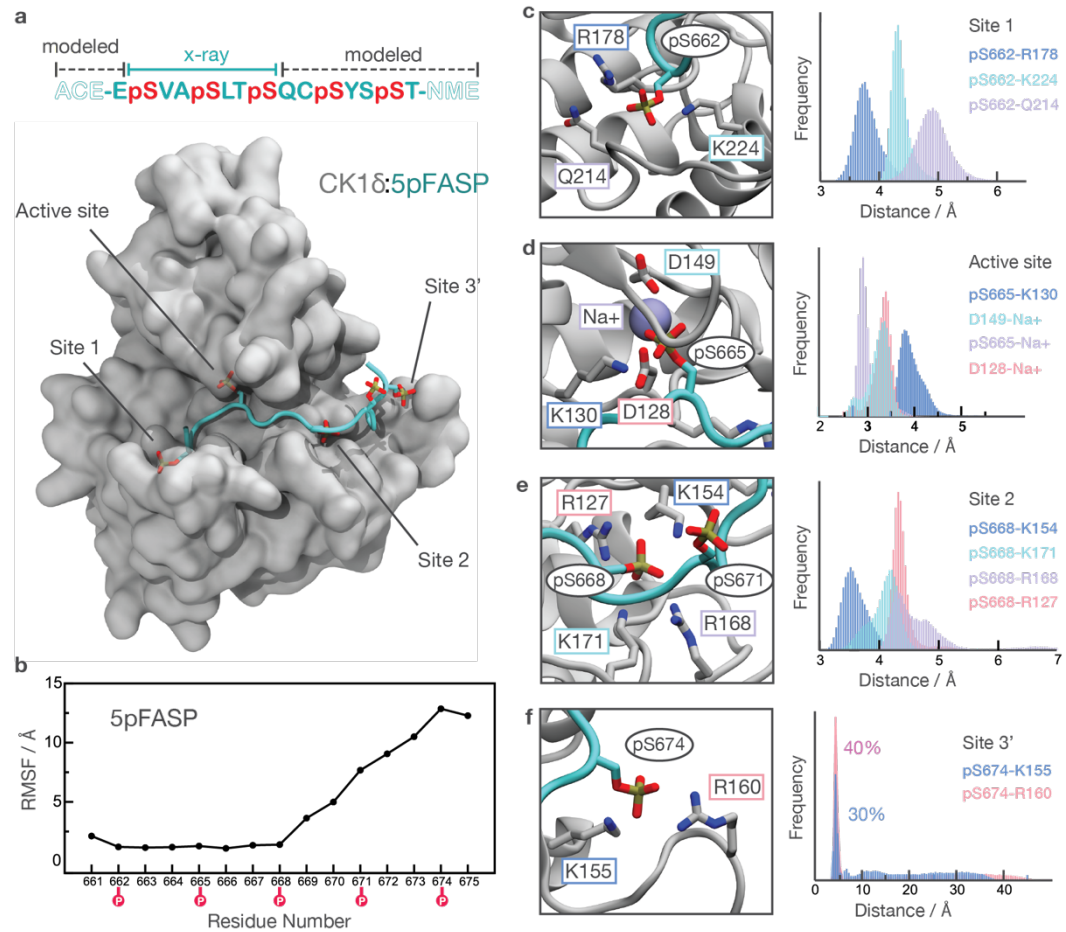

6

7 **Figure 5. Molecular dynamics simulations of CK1:5pFASP.**

- 8 **a**, Structural model of CK1 bound to a 5p FASP peptide obtained by Gaussian accelerated  
 9 Molecular Dynamics (GaMD). The molecular representation corresponds to one snapshot from  
 10 the MD trajectories. **b**, Root Mean Square Fluctuation (RMSF) of the 5pFASP peptide with  
 11 respect to its average conformation after aligning the MD trajectories with respect to CK1  
 12 backbone. **c-f**, Characterization of key interactions that stabilize the 5pFASP product in (c) Site



1 1, (d) the active site, (e) Site 2, and (f) an additional anion binding site located proximal to Site 2  
 2 (Site 3'). Histograms were computed based on distances sampled during the GaMD  
 3 simulations.

4

Figure 6

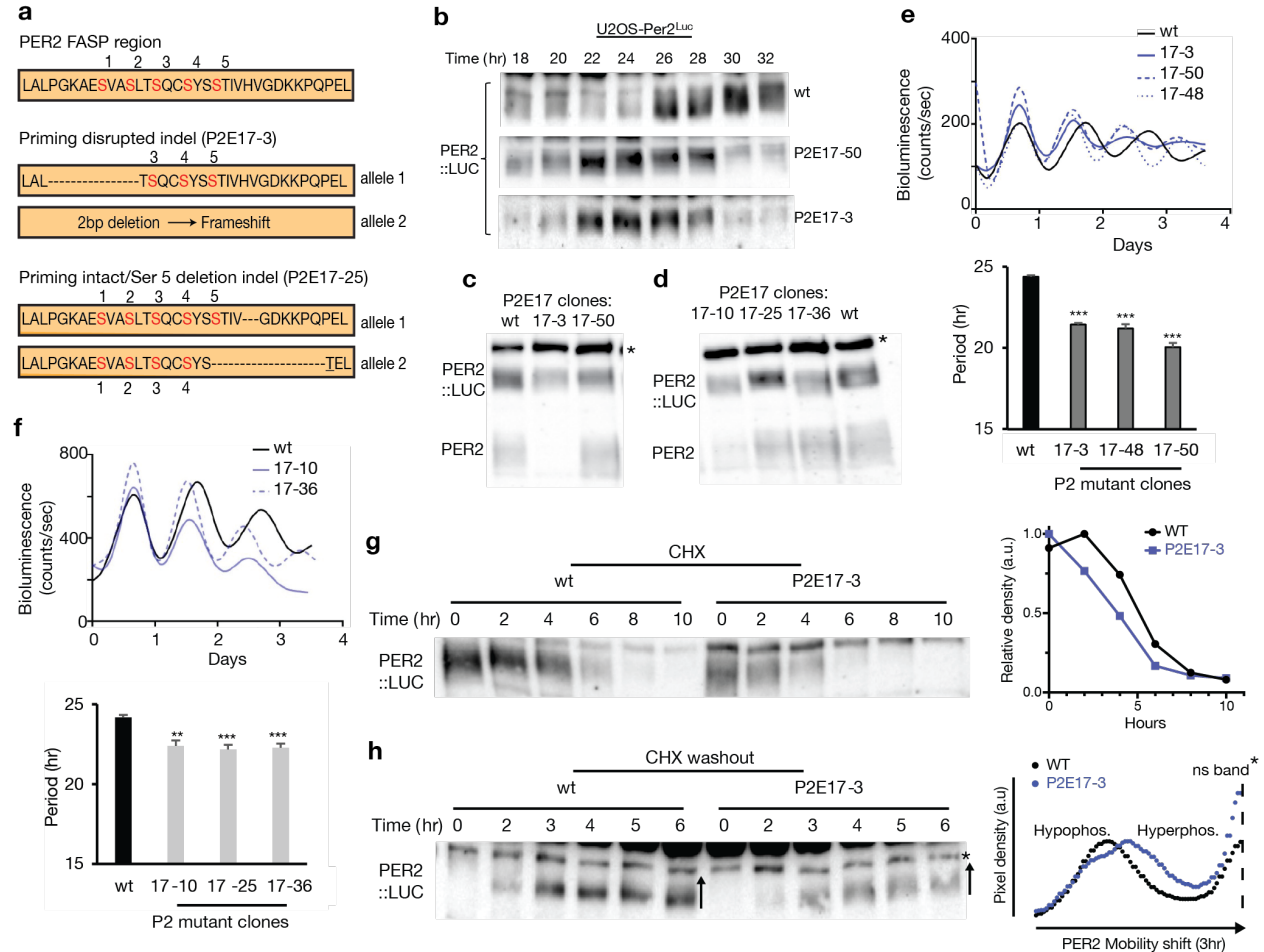

5

6 **Figure 6. Circadian rhythms are shortened by small deletions in the conserved FASP**  
 7 **domain of human PER2.**

8 a, Schematic representation of select in-frame deletions within the human PER2 FASP region  
 9 are separated into 2 classes: priming-disrupted (P2E17-3) or priming intact (P2E17-25). b,  
 10 Immunoblot of select priming-disrupted PER2::LUC mutants compared to WT PER2::LUC. Blot  
 11 representative of two independent experiments. c,d, Representative immunoblots for (c)

1 priming-disrupted or (d) priming intact PER2 mutants. \*nonspecific band. The *Per2* allele in  
2 clone 17-3 has a frame-shifting mutation leading to deletion of the untagged PER2. e,f, Real-  
3 time bioluminescence traces of circadian rhythms from WT and mutant *Per2* clones (e, priming-  
4 disrupted; f, priming intact) with quantification of mean period and SD from n = 3 cultures.  
5 Periods from mutant clones were compared to WT with an unpaired t-test: \*\*\*, p < 0.001. *Per2*  
6 priming intact mutants (clones 17-25 and 17-36) exhibited rhythms that were shortened to a  
7 lesser degree than the priming-disrupted mutants in e, p < 0.05. In both graphs, the first peaks  
8 are aligned to show differences in period clearly. g, Western blot and quantification of  
9 degradation of WT PER2::LUC and clone 17-3 after cycloheximide treatment. Blot  
10 representative of two independent assays (n = 2). h, Western blot and quantification of  
11 phosphorylation of *de novo* PER2 after protein depletion by 10 hr CHX treatment and washout.  
12 Blot representative of two independent assays (n = 2).  
13

Figure 7

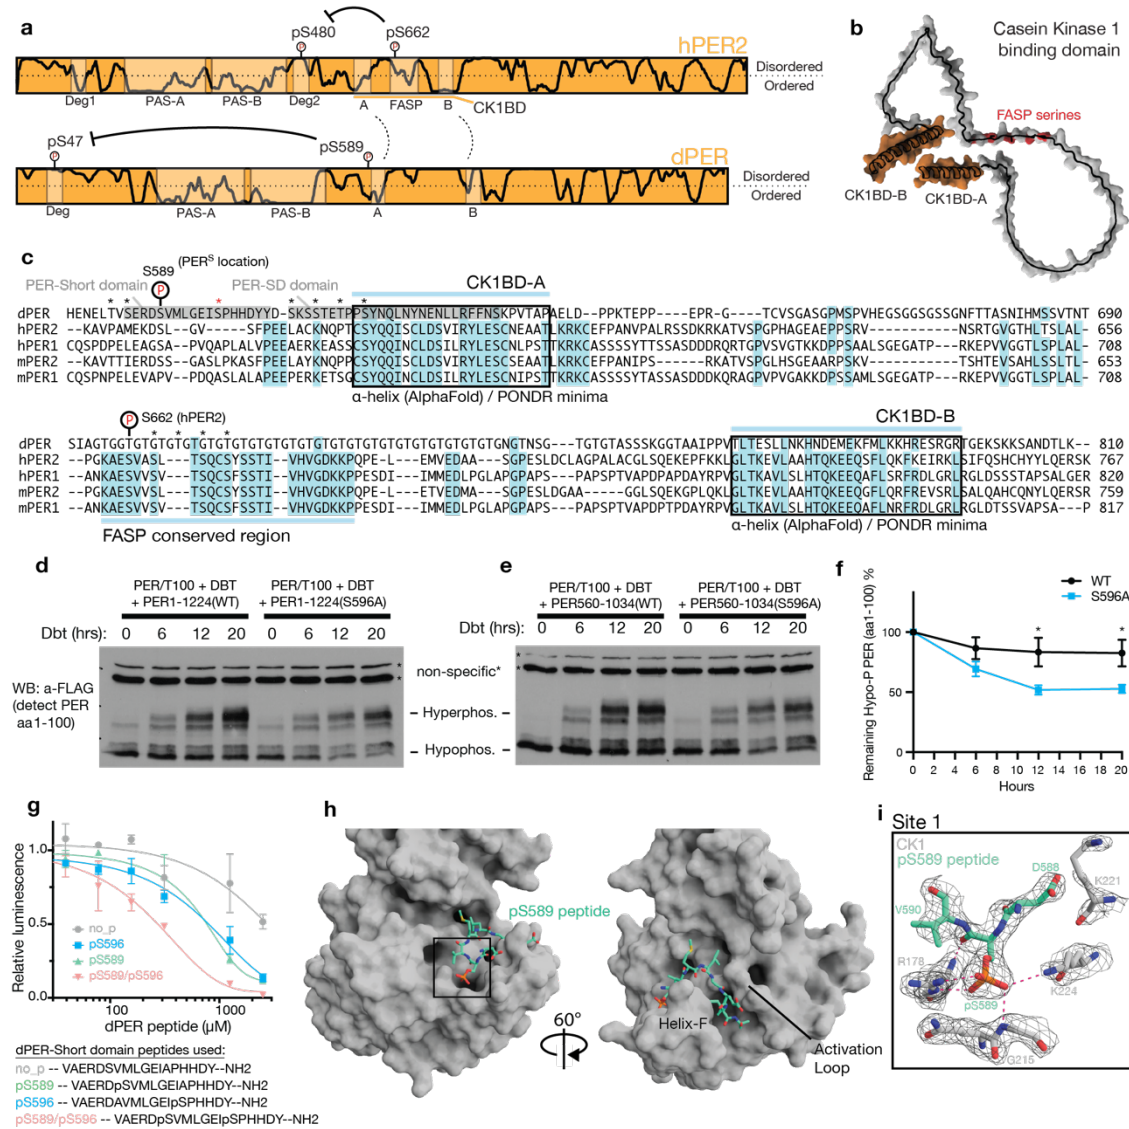

1  
2 **Figure 7. The phosphorylated PER-Short domain of *Drosophila* PER binds CK1 Site 1 to**  
3 **inhibit kinase activity.**

4 **a**, Schematic of human and *Drosophila* PER proteins, illustrating similar mechanisms of Degron  
5 regulation by phosphoserines proximal to the two conserved motifs of the CK1BD (see panel **c**).

6 **b**, AlphaFold2 structural prediction of the human PER2 CK1BD with helical motifs A and B

7 (orange) and FASP phosphorylation sites (red). **c**, Alignment of *Drosophila* PER, human and  
8 mouse PER1/2 proteins showing conservation and the dPER-Short and Short-Downstream

9 (SD) domains. \*, phosphorylation by either CK1 (black) or NEMO (red). **d-e**, Western blot of

1 dPER fragment (aa1-100). Samples collected at indicated timepoints after kinase induction,  
2 followed by protein extraction and TEV cleavage. **f**, Quantification of hypophosphorylated band  
3 (n=4). WT and S596A compared with Two-way ANOVA with Sidak multiple comparisons test: \*,  
4  $p < 0.05$ . **g**, ADP-Glo kinase assay of CK1 on the human PER2 PAS-Degron substrate in the  
5 presence of indicated peptides from dPER. Data are mean and SD from 2 replicates,  
6 representative of n = 3 independent assays. **h**, Structure of human CK1 (gray) bound to the  
7 dPER-Short peptide with pS589 (light green). **i**, Close-up view of dPER pS589 coordinated by  
8 CK1 residues in anion binding Site 1.

9

10

1 **Tables and legends**

2 **Table 1. X-ray crystallography data collection and refinement statistics**

|                                                        | <b>2pFASP:CK1δ</b>            | <b>3pFASP:CK1δ</b>          | <b>4pFASP:CK1δ</b>            | <b>pS589:CK1δ</b>             |
|--------------------------------------------------------|-------------------------------|-----------------------------|-------------------------------|-------------------------------|
| <b>Data collection</b>                                 |                               |                             |                               |                               |
| PDB Id.                                                | 8D7M                          | 8D7N                        | 8D7O                          | 8D7P                          |
| Beam line                                              | APS(23IDD)                    | APS(23IDD)                  | APS(23IDD)                    | APS(23IDD)                    |
| Resolution Range (Å)<br>(highest shell)*               | 46.15 - 2.25<br>(2.32 - 2.25) | 68.01-1.66<br>(1.69 - 1.66) | 67.70 - 1.65<br>(1.68 - 1.65) | 60.77 - 2.25<br>(2.32 - 2.25) |
| Space group                                            | C 1 2 1                       | C 1 2 1                     | C 1 2 1                       | P1                            |
| a, b, c                                                | 55.7, 135.97,<br>91.14        | 55.90, 136.03,<br>90.54     | 55.33, 135.40,<br>90.35       | 48.78, 56.74,<br>65.94        |
| $\alpha, \beta, \gamma$                                | 90, 94.3, 90                  | 90, 94.60, 90               | 90, 94.41, 90                 | 108.93, 95.63,<br>108.69      |
| Wavelength (Å)                                         | 1.03                          | 1.03                        | 1.03                          | 1.03                          |
| Total observations                                     | 176957 (15319)                | 480416 (23861)              | 468136 (24113)                | 85303 (7506)                  |
| Unique reflections                                     | 31319 (2767)                  | 79274 (3942)                | 78946 (4059)                  | 27457 (2505)                  |
| Completeness (%)                                       | 97.8 (94.5)                   | 100 (99.9)                  | 99.4 (99.2)                   | 93.7 (91.8)                   |
| $R_{\text{merge}}$                                     | 15.2 (127.4)                  | 9.3 (55.6)                  | 6.4 (54.2)                    | 11.6 (31.2)                   |
| $\langle I/\sigma \rangle$                             | 9.4 (2.5)                     | 9.9 (2.7)                   | 13.6 (2.9)                    | 5.5 (2.7)                     |
| CC1/2                                                  | 0.99 (0.55)                   | 0.99 (0.82)                 | 0.99 (0.84)                   | 0.98 (0.85)                   |
| Redundancy                                             | 5.7 (5.5)                     | 6.1 (6.1)                   | 5.9 (5.9)                     | 3.1 (3.0)                     |
| <b>Refinement</b>                                      |                               |                             |                               |                               |
| $R_{\text{work}}/ R_{\text{free}}$ (%)                 | 17.9 (22.9)                   | 18.8 (21.3)                 | 17.4 (21.1)                   | 19.7 (25.4)                   |
| Number of non-hydrogen atoms                           | 5075                          | 5388                        | 5342                          | 4999                          |
| Protein                                                | 4820                          | 4840                        | 4840                          | 4864                          |
| Water                                                  | 255                           | 548                         | 502                           | 135                           |
| B-factor (Wilson)                                      | 36.95                         | 33.32                       | 32.9                          | 29.93                         |
| RMSD Bond length (Å)                                   | 0.008                         | 0.01                        | 0.011                         | 0.009                         |
| RMSD Bond angle                                        | 1.05                          | 1.18                        | 1.18                          | 1.04                          |
| Ramachandran favored (%)/<br>Ramachandran outliers (%) | 97.04/0.0                     | 96.17/0.0                   | 96.34/0.26                    | 96.23/0.0                     |

3

4

5

6

7

8

1 **STAR Methods**

2 **RESOURCE AVAILABILITY**

3 ***Lead contact***

4 *Further information and requests for resources and reagents should be directed to and will be*  
5 *fulfilled by the lead contact, Carrie L. Partch ([cpartch@ucsc.edu](mailto:cpartch@ucsc.edu))*

6

7 ***Materials availability***

- 8     • Plasmids generated in this study are available upon request.
- 9     • U2OS reporter cell lines generated in this study are available upon request.

10 ***Data and code availability***

- 11     • Data and code generated in this study are available upon request.
- 12     • NMR chemical shift assignments for the human FASP peptide have been deposited at  
13 BMRB and will be publicly available upon publication. The BMRB entry number is listed  
14 in the Key Resources Table.
- 15     • Crystal structures of human CK1δ in complex with phosphorylated PER peptides have  
16 been deposited to the PDB and will be publicly available upon publication. Accession  
17 codes are listed in the Key Resources Table.

18

19 **EXPERIMENTAL MODEL AND SUBJECT DETAILS**

20 Cell lines

- 21     • The HEK293T cell line was purchased from ATCC (#CRL-3216).
- 22     • The *Drosophila* S2 cell line was purchased from Thermo Fisher Scientific (#R69007).
- 23     • The U2OS cell line was purchased from ATCC (#HTB-96).
- 24         ○ Generation of *Per* KI cell lines is described in detail in Park et al, 2022.

1 *Per* mutant clones in *Per*<sup>Luc</sup> reporter cell lines

2 Heterozygous KI clones, H10 for *Per1*<sup>Luc</sup> and LH1 for *Per2*<sup>Luc</sup>, were used to generate mutations  
3 in *Per1* and *Per2*, respectively. These mRuby3-expressing reporter cells were infected with all-  
4 in-one CRISPR adenovirus (*Per2*-E17-S662) or transfected with all-in-one pAdTrack-Cas9-  
5 DEST plasmids expressing GFP as described previously (Jin et al., 2019). sgRNA sequence  
6 and selected clones are summarized in the table below. For clonal isolation of mutant cells,  
7 GFP-positive cells were sorted by FACS into 96-well plates, and these clones were further  
8 selected based on alterations in period and/or phase in bioluminescence rhythms. In each  
9 project, the majority of putative mutant clones showed a similar degree of period lengthening or  
10 shortening in bioluminescence screening. The clones used in this study were fully characterized  
11 by sequencing and immunoblotting (**Supplemental File 1a.**)

12

| Genes       | Targets           | sgRNA Sequences (PAMs)    | Selected clones                               |
|-------------|-------------------|---------------------------|-----------------------------------------------|
| <i>Per1</i> | Exon 17<br>(S714) | GGCCAATAAGGCGGAGAGTG(TGG) | <i>Per1</i> <sup>Luc</sup> 1, 17, 38          |
| <i>Per2</i> | Exon 17<br>(S662) | GCCGGGCAAGGCAGAGAGTG(TGG) | <i>Per2</i> <sup>Luc</sup> 17-1, 17-3, 48, 50 |
| <i>Per2</i> | Exon 17<br>(H678) | AGCAGCACCATCGTCCATGT(GGG) | <i>Per2</i> <sup>Luc</sup> 10, 25, 36         |

13

14

15

## 1 **METHOD DETAILS**

### 2 Expression and purification of recombinant proteins

3 All proteins were expressed from a pET22-based vector in *Escherichia coli* BL21 (DE3)  
4 Rosetta2 cells (Sigma Aldrich) based on the Parallel vector series (Sheffield et al., 1999). The  
5 wild-type recombinant FASP peptide (residues 645–687) or PAS-Degron peptide (residues  
6 475–505) were cloned from human PER2. All peptides were expressed downstream of an N-  
7 terminal TEV-cleavable His-NusA tag (HNXL). Human CK1δ catalytic domains (CK1δ ΔC,  
8 residues 1–317 for kinase assays and 1-294 for crystallography) were all expressed in BL21  
9 (DE3) Rosetta2 cells (Sigma Aldrich) with a TEV-cleavable His-GST tag. Mutations were made  
10 using standard site-directed mutagenesis protocols and validated by sequencing. All proteins  
11 and peptides expressed from Parallel vectors have an N-terminal vector artifact (GAMDPEF)  
12 remaining after TEV cleavage and the peptides have a tryptophan and polybasic motif  
13 (WRKKK) following the vector artifact. Cells were grown in LB media (for natural abundance  
14 growths) or M9 minimal media with the appropriate stable isotopes, i.e., <sup>15</sup>N/<sup>13</sup>C, for NMR as  
15 done before (Narasimamurthy et al., 2018) at 37°C until the O.D.<sub>600</sub> reached ~0.8; expression  
16 was induced with 0.5 mM IPTG, and cultures were grown for approximately 16–20 hr more at  
17 18°C.

18 For CK1δ kinase domain protein preps, cells were lysed in 50 mM Tris pH 7.5, 300 mM NaCl, 1  
19 mM TCEP, and 5% glycerol using a high-pressure extruder (Avestin) or sonicator on ice (Fisher  
20 Scientific). HisGST-CK1δ ΔC fusion proteins were purified using Glutathione Sepharose 4B  
21 resin (GE Healthcare) using standard approaches and eluted from the resin using Phosphate  
22 Buffered Saline with 25 mM reduced glutathione. His-TEV protease was added to cleave the  
23 His-GST tag from CK1δ ΔC at 4°C overnight. Cleaved CK1δ ΔC was further purified away from  
24 His-GST and His-TEV using Ni-NTA resin (Qiagen) and subsequent size exclusion  
25 chromatography on a HiLoad 16/600 Superdex 75 prep grade column (GE Healthcare) in 50



1 mM Tris pH 7.5, 200 mM NaCl, 5 mM BME, 1 mM EDTA, and 0.05% Tween 20. Purified CK1 $\delta$   
2  $\Delta$ C proteins used for *in vitro* kinase assays were buffer exchanged into storage buffer (50 mM  
3 Tris pH 7.5, 100 mM NaCl, 1 mM TCEP, 1 mM EDTA, and 10% glycerol) using an Amicon Ultra  
4 centrifugal filter (Millipore) and frozen as small aliquots in liquid nitrogen for storage at -80°C.  
5 For PER2 peptide preps, cells were lysed in a buffer containing 50 mM Tris pH 7.5, 500 mM  
6 NaCl, 2 mM TCEP, 5% glycerol and 25 mM imidazole using a high-pressure extruder (Avestin)  
7 or sonicator on ice (Fisher Scientific). His-NusA-FASP or His-NusA-PAS-Degron fusion proteins  
8 were purified using Ni-NTA resin using standard approaches and eluted from the resin using 50  
9 mM Tris pH 7.5, 500 mM NaCl, 2 mM TCEP, 5% glycerol and 250 mM imidazole. His-TEV  
10 protease was added to cleave the His-NusA tag from the PER2 peptides at 4°C overnight. The  
11 cleavage reaction was subsequently concentrated and desalted into low imidazole lysis buffer  
12 using a HiPrep 26/10 Desalting column. Peptides were purified away from His-NusA and His-  
13 TEV using Ni-NTA resin with 50 mM Tris pH 7.5, 500 mM NaCl, 2 mM TCEP, 5% glycerol and  
14 25 mM imidazole. Peptides were purified by size exclusion chromatography on a HiLoad 16/600  
15 Superdex 75 prep grade column, using NMR buffer (25 mM MES pH 6.0, 50 mM NaCl, 2 mM  
16 TCEP, 10 mM MgCl<sub>2</sub>) or 1x kinase buffer (25 mM Tris pH 7.5, 100 mM NaCl, 10 mM MgCl<sub>2</sub>, and  
17 2 mM TCEP) for NMR or ADP-Glo kinase assays, respectively.

18

### 19 NMR kinase assays

20 NMR spectra were collected on a Varian INOVA 600 MHz or a Bruker 800 MHz spectrometer  
21 equipped with a <sup>1</sup>H, <sup>13</sup>C, <sup>15</sup>N triple resonance z-axis pulsed-field-gradient cryoprobe. Spectra  
22 were processed using NMRPipe (Delaglio et al., 1995) and analyzed using CCPNmr Analysis  
23 (Vranken et al., 2005). Backbone resonance assignments were made using standard BioPack  
24 triple resonance experiments (HNCACB, CBCA (CO)NH, HNCO, HN (CA)CO and HSQC)  
25 collected using non-uniform sampling on a sample of 0.5 mM <sup>13</sup>C, <sup>15</sup>N-labeled FASP in NMR

1 buffer with 10% D<sub>2</sub>O. Non-uniform sampling reconstructions were performed using software  
2 developed and provided by the Wagner lab (Delaglio et al., 1995). NMR kinase reactions were  
3 performed at 25°C with 0.2 mM <sup>15</sup>N-FASP, 2.5 mM ATP and 1 μM CK1δ ΔC (WT or K224D).  
4 SOFAST HMQC spectra (total data acquisition = 6 min) were collected at the indicated intervals  
5 for 3 hr and relative peak volumes were calculated and normalized as described previously  
6 (Narasimamurthy et al., 2018). For PER1 FASP peptide kinase assays, samples were prepared  
7 as above and incubated for 2 hrs and then quenched with 20 mM EDTA and then HSQC  
8 spectra were collected. Data analysis was performed using Prism (GraphPad), with data fit to  
9 either a one-phase exponential or linear regression.

10

#### 11 Kinetic modeling

12 Mathematica 11.0 (Wolfram Research) was used to model the 5-step ordered distributive kinetic  
13 model for sequential FASP phosphorylation (**Figure 2a-c**). Mathematica code is provided in the  
14 supplementary information (**Supplementary File 1c**).

15

#### 16 ADP-Glo kinase assays (substrate titrations)

17 Kinase reactions were performed on the indicated recombinant peptides (FASP WT or Alanine  
18 mutants) using the ADP-Glo kinase assay kit (Promega) according to manufacturer's  
19 instructions. All reactions were performed in 30 μL volumes using 1x kinase buffer (25 mM Tris  
20 pH 7.5, 100 mM NaCl, 10 mM MgCl<sub>2</sub>, and 2 mM TCEP) supplemented with ATP and substrate  
21 peptides. To determine apparent kinetic parameters  $K_M$  and  $V_{max}$ , duplicate reactions with 100  
22 μM ATP and 0.2 μM CK1δ ΔC kinase were incubated in 1x kinase buffer at room temperature  
23 for 1 hr with the indicated amount of substrate peptide (and repeated for n = 3 independent  
24 assays). 5 μL aliquots were taken and quenched with ADP-Glo reagent after the 1 hr incubation,  
25 and Luminescence measurements were taken at room temperature with a SYNERGY2  
26 microplate reader (BioTek) in 384-well microplates. Linearity of the 1 hr reaction rate was

1 determined by performing larger reactions (50  $\mu$ L) with CK1 $\delta$   $\Delta$ C and quenching at discrete time  
2 points (data not shown). Data analysis was performed using Excel (Microsoft) or Prism  
3 (GraphPad).

4

#### 5 ADP-Glo kinase assays (peptide inhibition)

6 Kinase reactions were performed on the recombinant PAS-Degron peptide (**Supplementary**  
7 **Figure 2b**) using the ADP-Glo kinase assay kit (Promega) according to manufacturer's  
8 instructions. Synthetic peptide inhibitors were solubilized in 1x kinase buffer (25mM Tris pH 7.5,  
9 100 mM NaCl, 10 mM MgCl<sub>2</sub>, and 2 mM TCEP) at a concentration of 10 mM. All kinase  
10 reactions were performed in 30  $\mu$ L reactions supplemented with ATP, PAS-Degron substrate,  
11 and synthetic peptide inhibitors. Duplicate reactions (repeated for n = 3 independent assays)  
12 with 100  $\mu$ M ATP, 0.2  $\mu$ M CK1 $\delta$   $\Delta$ C kinase, and 100  $\mu$ M PAS-Degron substrate were incubated  
13 in 1x kinase buffer at room temperature for 1 hr in the presence of increasing amounts of  
14 synthetic peptide inhibitors (phosphorylated FASP or dPER peptides) as indicated. 5  $\mu$ L aliquots  
15 were quenched with ADP-Glo reagent after the 1 hr incubation, and luminescence  
16 measurements were taken at room temperature with a SYNERGY2 microplate reader (BioTek)  
17 in 384-well microplates. Data analysis was performed using Excel (Microsoft) or Prism  
18 (GraphPad).

19

#### 20 Full-length PER2 kinase assay (peptide inhibition)

21 HEK293 cells transfected with Myc-PER2 plasmid were lysed in cell lysis buffer (50 mM Tris-  
22 HCl pH 8.0, 150 mM NaCl, 1% Nonidet P-40, and 0.5% deoxycholic acid containing Complete  
23 protease inhibitors (Roche) and PhosStop phosphatase inhibitors (Roche)). 300  $\mu$ g of the  
24 protein lysate was added with 3  $\mu$ g of anti-Myc antibody (9E10) and allowed to rotate at 4°C for  
25 1 hr, which was followed by addition of Protein A/G magnetic beads (Thermo Scientific) and  
26 rotation at 4°C for 1hr. Then the beads were collected and washed 3x with lysis buffer. Beads

1 were then collected and treated with FastAP alkaline phosphatase (Thermo Scientific) for 30  
2 min at 37°C and washed 3x with lysis buffer and 2x with kinase assay buffer (25 mM Tris pH  
3 7.5, 5 mM beta glycerophosphate, 2 mM DTT and 0.1 mM sodium orthovanadate). CK1δ ΔC  
4 (200 ng) was incubated with either 1 mM of non-phospho (NP) FASP peptide RKKK(mouse  
5 PER2 residue 642)TEVSAHLSSLTLPGKAESVSLTSQ (Narasimamurthy et al., 2018) or the  
6 human PER2 4pFASP peptide GKAEpSVApSLTpSQcSYA for 15 min at 25°C. The beads  
7 were split into three samples with kinase assay buffer containing 10 mM of magnesium chloride  
8 and 200 μM of ATP. The first portion was left untreated while the second and third were  
9 incubated with CK1δ-ΔC (200 ng) that had been pre-incubated with NP FASP or 4pFASP  
10 peptide, respectively, and incubated for 60 min at 25°C. The beads were collected by  
11 centrifugation and protein was eluted by adding protein loading dye and analyzed by SDS-  
12 PAGE gel for Western blotting with anti-mouse PER2 pSer 659 antibody as previously  
13 described (Narasimamurthy et al., 2018).

14

#### 15 Real-time PER2::LUC half-life measurement

16 1 μg of the indicated human PER2::LUC expression plasmids (under a PGK promoter) were  
17 transiently transfected alone or with 100 ng myc-CK1ε (under a CMV promoter) in 35 mm  
18 dishes of HEK293T cells in MOPS-buffered high glucose media supplemented with D-luciferin  
19 (8.3g/L DMEM, 0.35 mg/mL sodium bicarbonate, 5 mg/mL glucose, 0.02 M MOPS, 100 U/mL  
20 penicillin, 100 μg/mL streptomycin, and 100 mM D-luciferin). Dishes were sealed with 40 mm  
21 cover glasses and vacuum grease (Sigma Aldrich), and then placed in a LumiCycle 32  
22 (Actimetrics) at 37°C. 24 hrs post transfection, 40 μg/mL cycloheximide (Sigma) was added per  
23 35 mm dish and luminescence recording was initiated. Luminescence data were used to  
24 calculate PER2::LUC half-life in Prism (GraphPad) using one-phase decay algorithm as  
25 described previously (Zhou et al., 2015), beginning from the point of cycloheximide addition to  
26 the plateau at minimum luciferase activity ( $n \geq 4$ ).

1

## 2 Co-immunoprecipitation assays

3 Human myc-PER2, FLAG-CK1 $\delta$  and FLAG- $\beta$ -TrCP expression plasmids (1.5  $\mu$ g, 1.5  $\mu$ g WT or  
4 0.75  $\mu$ g K38A, and 3  $\mu$ g of plasmid DNA, respectively) were co-transfected in 60 mm dishes of  
5 HEK293T cells in DMEM supplemented with 1% penicillin/streptomycin and 10% HyClone  
6 FetalClone II FBS (Fisher Science). The proteasome was inhibited 16 hrs prior to harvest with  
7 10  $\mu$ M MG132 (Sigma Aldrich) and cells were harvested 72 hrs post transfection. Cells were  
8 lysed in 350  $\mu$ L mammalian cell lysis buffer (20 mM Tris pH 7.5, 150 mM NaCl, 1mM TCEP, 1%  
9 NP-40) supplemented with EDTA-free protease inhibitors (Pierce) and phosphatase inhibitors (1  
10 mM NaF, 1 mM  $\beta$ -glycerophosphate and 1 mM Na<sub>3</sub>VO<sub>4</sub>). 30  $\mu$ L input samples were prepared  
11 with 2x SDS sample buffer, and the remaining lysate was incubated with 30  $\mu$ L of anti-Myc  
12 agarose slurry (cat. #sc-40 AC, Santa Cruz Biotechnology) and tumbled overnight at 4°C.  
13 Bound samples were washed 3x with 400  $\mu$ L of IP wash buffer (20 mM Tris pH 7.5, 150 mM  
14 NaCl) and 6x SDS sample buffer. All samples were briefly boiled at 95°C and resolved by 7.5%  
15 polyacrylamide-SDS gel electrophoresis (PAGE) and transferred to nitrocellulose membrane via  
16 Trans-Blot Turbo transfer system (Bio-Rad). Membranes were incubated in TBST blocking  
17 buffer (20 mM Tris pH 7.5, 150 mM NaCl, 0.1% TWEEN 20 and 5% (weight/vol, w/v) Marvel  
18 dried skimmed milk) for 1 hr and then incubated with antibody (1:2000  $\alpha$ -Myc HRP (cat. #sc-40  
19 HRP), Santa Cruz Biotechnology) or 1/1000  $\alpha$ -OctA HRP (cat. #sc-166355 HRP, Santa Cruz  
20 Biotechnology)) in blocking buffer at 4°C overnight. Membranes were washed the next day 3x  
21 with TBST and chemiluminescence detection was performed using Immobilon reagent  
22 (Millipore) and imaged with ChemiDoc (Bio-Rad). Representative blot shown (n = 3).

23

## 24 Crystallization and structure determination

25 All peptides were solubilized in a solution of 0.15 M Succinic Acid pH 5.5 and 20% (w/v) PEG  
26 3350 and soaked overnight into crystals of human CK1 $\delta$  (1-294) that were crystallized using the

1 hanging drop vapor diffusion method as follows: the 4pFASP peptide was added to CK1 $\delta$   
2 crystals that were crystallized in 0.13 M Succinic Acid pH 5.5 and 27% (w/v) PEG 3350; the  
3 3pFASP peptide was added to CK1 $\delta$  crystals that were crystallized in 0.1 M Succinic Acid pH  
4 5.5 and 15% (w/v) PEG 3350; the 2pFASP peptide was added to CK1 $\delta$  crystals that were  
5 crystallized in 0.15 M Succinic Acid pH 5.5 and 22% (w/v) PEG 3350; and the pS589 peptide  
6 was added to CK1 $\delta$  crystals that were crystallized in 0.16 M Succinic Acid pH 5.5 and 23% PEG  
7 (w/v) 3350. The crystals were looped and briefly soaked in a drop of cryo-preservation solution  
8 (80% peptide solution, 20% glycerol) and then flash-cooled in liquid nitrogen for X-ray diffraction  
9 data collection. Data sets were collected at the 23-ID-D beamline at the Advanced Photon  
10 Source (APS) at the Argonne National Laboratory. Data were indexed, integrated and merged  
11 using the CCP4 software suite (Winn et al., 2011). Structures were determined by molecular  
12 replacement with Phaser MR (McCoy et al., 2007) using the apo structure of wild-type CK1 $\delta$   $\Delta$ C  
13 (PDB: 6PXO). Model building was performed with Coot (Emsley et al., 2010) and structure  
14 refinement was performed with PHENIX (Adams et al., 2011). All structural models and  
15 alignments were generated using PyMOL Molecular Graphics System 2.0 (Schrödinger). X-ray  
16 crystallography data collection and refinement statistics are provided in supplementary  
17 information (**Table 1**).

18

### 19 pLogogram analysis

20 The Comparative Site Search function of PhosphoSitePlus (v6.6.0.4) (Hornbeck, 2015) was  
21 used to obtain a list of known CK1 $\delta$  substrates (**Supplementary File 1b**). The substrates were  
22 all limited to 15 residues in length with the center residue being the site of phosphorylation. The  
23 Sequence Logo Analysis tool from PhosphoSitePlus was used on the resulting dataset to  
24 generate a pLogogram indicating the relative frequency of amino acid types in positions flanking  
25 the site of phosphorylation.

26

1 Molecular dynamics

2 *Molecular modeling:* To build the molecular model of 5pFASP-CK1, we started from the  
3 3pFASP x-ray structure and then added E661 and residues 669 to 675 with Maestro  
4 (Schrodinger Release 2020-3) in a linear conformation. To avoid artificial interactions arising  
5 from the short size of the peptide, we capped the N- and C-terminal residues with acetyl (ACE)  
6 and N-methyl amine (NME) groups, respectively. Hydrogens were added with PrepWizard  
7 module, and a restrained minimization was to remove potential clashes between the modeled  
8 FASP peptide and the enzyme.

9

10 *System preparation:* CK1-5pFASP complex was solvated in a pre-equilibrated TIP3P  
11 (Jorgensen et al., 1983) water box with at least 15 Å between the protein and the box  
12 boundaries. The net charge of the system was neutralized with a Na<sup>+</sup> ion. Parameters for  
13 protein residues, capping groups, and Na<sup>+</sup> were obtained from ff14SB forcefield (Maier et al.,  
14 2015).

15

16 *Equilibration:* Minimization and equilibration were performed with AMBER16 (Case, 2016) using  
17 the following protocol: (i) 2000 steps of energy minimization with 500 kcal mol<sup>-1</sup> Å<sup>-1</sup> position  
18 restraints on all protein atoms; (ii) 5000 steps of energy minimization with 500 kcal mol<sup>-1</sup> Å<sup>-1</sup>  
19 position restraints on all CK1 atoms and on the backbone atoms of FASP; (iii) 5000 steps of  
20 energy minimization with 500 kcal mol<sup>-1</sup> Å<sup>-1</sup> position restraints on all backbone atoms; (iv) 5000  
21 steps of energy minimization with 500 kcal mol<sup>-1</sup> Å<sup>-1</sup> position restraints on CK1 backbone atoms;  
22 (v) 5000 steps of energy minimization without any position restraints; (vi) 50 ps of NVT  
23 simulations, with gradual heating of the system to a final temperature of 300 K and 10 kcal mol<sup>-1</sup>  
24 Å<sup>-1</sup> position restraints on protein atoms; (vii) 1 ns of NPT simulation with 100 kcal mol<sup>-1</sup> Å<sup>-1</sup>  
25 position restraints on protein atoms; and (viii) 1 ns of NPT simulation to equilibrate the density  
26 (or final volume of the simulation box).

1  
2 *Simulations:* Gaussian accelerated MD simulations (GaMD) were performed in the NVT regime,  
3 with a time step of 2 fs. The PME method was used to calculate electrostatic interactions with  
4 periodic boundary conditions (Darden et al., 1993). To accelerate sampling of the  
5 conformational space, we used boost parameters as described in (Miao et al., 2015). All  
6 systems had a threshold energy  $V = V_{\max}$  and were subjected to a dual boost acceleration of  
7 both dihedral and total potential energies. To optimize the acceleration parameters, we first ran  
8 2 ns of conventional MD simulation (without boost potentials) during which  $V_{\min}$ ,  $V_{\max}$ ,  $V_{\text{avg}}$ ,  
9 and  $\sigma_{\text{avg}}$  were recorded and used to calculate boost potentials as previously detailed (Miao et  
10 al., 2015). These potentials were employed to start 50 ns of preparatory GaMD simulations,  
11 during which the boost statistics and boost potentials were updated until the maximum  
12 acceleration was achieved. The maximum acceleration was constrained by setting the upper  
13 limit of the standard deviation of the total boost potential to be  $\leq 6$  kcal/mol. Starting from the  
14 same equilibrated structure, we launched 10 independent GaMD simulations with different initial  
15 velocities. Each simulation ran for 100 ns, totalizing 1  $\mu\text{s}$  of sampling time.

16

### 17 Bioluminescence recording of $Per^{Luc}$ reporter cell lines

18 Cells were plated into 24-well plates or 35 mm dishes to be approximately 90% confluent 24  
19 hours prior to the start of the experiment. Immediately before the start of the experiment, cells  
20 were given a two-hour serum shock with 50% horse serum in DMEM or 10  $\mu\text{M}$  forskolin (Sigma  
21 Aldrich) in DMEM (Fig S5), washed with phosphate-buffered saline (PBS) and fresh DMEM  
22 supplemented with 1% FBS, 7.5 mM sodium bicarbonate, 10 mM HEPES, 25 U/mL penicillin,  
23 25  $\mu\text{g}/\text{mL}$  streptomycin, and 0.1 mM luciferin. The plates were sealed with cellophane tape and  
24 the dishes with a 40 mm cover glass and vacuum grease before placing them into a Lumicycle  
25 32 or 96 (Actimetrics). For all bioluminescence experiments, the results were reproduced in at  
26 least two independent experiments. Real-time levels, period, and phase of the bioluminescence



1 rhythms were evaluated using the Lumicycle software (Actimetrics). Student's t-test was used to  
2 compare data from WT and mutant cells.

3

#### 4 Circadian sampling and drug treatments in *Per<sup>Luc</sup>* reporter cell lines

5 To measure PER rhythms in WT and mutant cells, cells were seeded in 60 mm dishes to be  
6 90% confluent 24 hours prior to the experiment. These cells were treated with 50% horse serum  
7 in DMEM for 2 hrs and harvested at the indicated times. For cycloheximide (CHX) treatment, 8  
8  $\mu\text{g}/\text{mL}$  CHX (Sigma Aldrich) was added to cells and cells were collected at specified times after  
9 the treatment. For CHX washout experiments, cells were treated with CHX for 8 hrs followed by  
10 the normal DMEM, and cells were harvested at the indicated times after the CHX treatment.

11

#### 12 Immunoblotting of *Per<sup>Luc</sup>* reporter cell lines

13 Cells were harvested from 60 mm dishes and flash-frozen on dry ice. Protein extraction and  
14 immunoblotting were performed as previously described (D'Alessandro et al., 2015). Briefly,  
15 cells were homogenized at 4°C in 70  $\mu\text{L}$  extraction buffer (EB) (0.4 M NaCl, 20 mM HEPES pH  
16 7.5, 1 mM EDTA, 5 mM NaF, 1 mM dithiothreitol, 0.3% Triton X-100, 5% glycerol, 0.25 mM  
17 phenylmethylsulfonyl fluoride (PMSF), 10 mg/mL aprotinin, 5 mg/mL leupeptin, 1 mg/mL  
18 pepstatin A). Homogenates were cleared by centrifugation for 12 min at 12,000 g at 4°C.  
19 Supernatants were mixed with 2x SDS sample buffer and boiled. Proteins were separated by  
20 electrophoresis through SDS polyacrylamide gels and then transferred to nitrocellulose  
21 membranes. Membranes were blocked with 5% (w/v) non-fat dry milk in TBS-0.05% Tween-20  
22 (TBST), incubated with primary antibodies (GP62 for PER1 and GP49 for PER2 (Jin et al.,  
23 2019)) overnight followed by incubation with secondary antibodies for 1 h. The blots were  
24 developed using the WestFemto enhanced chemiluminescence substrate (Thermo Fisher  
25 Scientific).

26

1 *Drosophila* S2 cell experiments

2 The plasmids pMT-*dbt*-V5, pAc-3XFLAG-His-*dper*/Tev100-6Xc-myc (Chiu et al., 2008), pAc-  
3 *dper* WT (aa1-1224)-V5, pAc-*dper* S596A (aa1-1224)-V5 (Chiu et al., 2011), pAc-*dper* WT  
4 (aa560-1034)-V5 (Ko et al., 2010) were previously described. pAc-*dper* S596A (aa560-1034)-V5  
5 was generated via PCR mutagenesis using pAc-*dper* WT (aa560-1034)-V5 as a template as  
6 described in (Chiu et al., 2011) and the QuikChange II site-directed mutagenesis kit (Agilent).  
7 *Drosophila* S2 cells and *Schneider's Drosophila* medium were obtained from Life Technologies  
8 (Thermo Fisher Scientific). S2 cells were seeded at  $1 \times 10^6$  cells/mL in a 6-well plate and  
9 transfected using Effectene (Qiagen). S2 cells were co-transfected with 0.2  $\mu$ g of pMT-*dbt*-V5,  
10 0.8  $\mu$ g of pAc-3X-FLAG-His-*dper*/Tev100-6Xc-myc, and varying amounts of *dper*-V5 plasmids  
11 as indicated. Expression of *dbt* was induced with 500  $\mu$ M CuSO<sub>4</sub> 36 hours after transfection.  
12 Cells were harvested at the indicated time points after kinase induction and extracted with 100-  
13 150  $\mu$ L EB2 (20 mM Hepes pH 7.5, 100 mM KCl, 5% glycerol, 5 mM EDTA, 1 mM DTT, 0.1%  
14 Triton X-100, 25 mM NaF, 0.5 mM PMSF). 1  $\mu$ L of AcTEV protease (Thermo Fisher Scientific)  
15 was added to protein extracts and incubated 16 hours at 4°C. Following TEV cleavage, protein  
16 concentration was measured using Pierce Coomassie Plus Assay Reagents (Thermo Fisher  
17 Scientific). 2X SDS sample buffer was added and the mixture boiled at 95°C for 5 minutes.  
18 Equal amounts of proteins were resolved by 16% polyacrylamide-SDS gel electrophoresis  
19 (PAGE) and transferred to nitrocellulose membrane (Bio-Rad) using a Semi-Dry Transfer Cell  
20 (Bio-Rad). Membranes were incubated in 5% Blocking Buffer (Bio-Rad) for 40 minutes at room  
21 temperature, and then incubated with anti-FLAG (cat. # F1804, Millipore Sigma) at 1:7000 for  
22 16-20 hours at room temperature. Blots were washed with 1X TBST for 1 hour, incubated with  
23 anti-mouse IgG HRP (cat. #12-349, Millipore Sigma) at 1:2000 for 1 hour. After washing,  
24 chemiluminescence detection was performed using Clarity ECL reagent in combination with the  
25 ChemiDoc imager (Bio-Rad). ImageJ Version 2.0.0-rc-67/1.52d (NIH) was used to quantify  
26 hypo-phosphorylated PER and nonspecific signals (indicated by asterisks). PER signal was

1 normalized to nonspecific signal and the data were scaled with normalized PER signal at 0 hr to  
2 a value of 1. Two-way ANOVA with Sidak multiple comparisons test was performed using Prism  
3 (GraphPad).

4

## 5 **QUANTIFICATION AND STATISTICAL ANALYSIS**

6 All statistical analyses were done using Prism (Graphpad). P-values were calculated using  
7 Students t-test, one-way ANOVA with Tukey's multiple comparisons test, or two-way ANOVA  
8 with Sidak multiple comparisons test as indicated in different figures. In all figures, \* indicates  
9  $p < 0.05$ , \*\* $p < 0.01$ , \*\*\* $p < 0.001$ , \*\*\*\* $p < 0.0001$ ; ns, not significant.

10

## 11 **Supplemental File Titles and Legends**

12 **Supplementary Table 1. Sequencing details for mutant *PER<sup>Luc</sup>* U2OS cell lines.**

13 **Supplementary Table 2. PhosphositePlus kinase substrate data set used for pLogogram**  
14 **analysis.**

15 **Supplementary Table 3. Kinetic modeling of ordered distributive mechanism using**  
16 **Mathematica.**

17

## 18 **References**

19 Adams, P.D., Afonine, P.V., Bunkoczi, G., Chen, V.B., Echols, N., Headd, J.J., Hung,  
20 L.W., Jain, S., Kapral, G.J., Grosse Kunstleve, R.W., *et al.* (2011). The Phenix software  
21 for automated determination of macromolecular structures. *Methods* 55, 94-106.

22  
23 Aryal, R.P., Kwak, P.B., Tamayo, A.G., Gebert, M., Chiu, P.L., Walz, T., and Weitz, C.J.  
24 (2017). Macromolecular Assemblies of the Mammalian Circadian Clock. *Mol Cell* 67,  
25 770-782 e776.

26

27 Baylies, M.K., Vosshall, L.B., Sehgal, A., and Young, M.W. (1992). New short period  
28 mutations of the *Drosophila* clock gene *per*. *Neuron* 9, 575-581.

29

30 Beesley, S., Kim, D.W., D'Alessandro, M., Jin, Y., Lee, K., Joo, H., Young, Y., Tomko,  
31 R.J., Jr., Faulkner, J., Gamsby, J., *et al.* (2020). Wake-sleep cycles are severely

- 1 disrupted by diseases affecting cytoplasmic homeostasis. *Proc Natl Acad Sci U S A*  
2 *117*, 28402-28411.  
3
- 4 Cao, X., Yang, Y., Selby, C.P., Liu, Z., and Sancar, A. (2021). Molecular mechanism of  
5 the repressive phase of the mammalian circadian clock. *Proc Natl Acad Sci U S A* *118*.  
6
- 7 Case, D.A., Betz, R.M., Cerutti, D.S., Cheatham III, D.E., Darden, T.A., Duke, R.E.,  
8 Giese, T.J., Gohlke, H., Goetz, A.W., Homeyer, N., et al. (2016). AMBER 16.  
9 ((University of California, San Francisco)).  
10
- 11 Chen, R., Schirmer, A., Lee, Y., Lee, H., Kumar, V., Yoo, S.H., Takahashi, J.S., and  
12 Lee, C. (2009). Rhythmic PER abundance defines a critical nodal point for negative  
13 feedback within the circadian clock mechanism. *Mol Cell* *36*, 417-430.  
14
- 15 Chiou, Y.Y., Yang, Y., Rashid, N., Ye, R., Selby, C.P., and Sancar, A. (2016).  
16 Mammalian Period represses and de-represses transcription by displacing CLOCK-  
17 BMAL1 from promoters in a Cryptochrome-dependent manner. *Proc Natl Acad Sci U S*  
18 *A* *113*, E6072-E6079.  
19
- 20 Chiu, J.C., Ko, H.W., and Edery, I. (2011). NEMO/NLK phosphorylates PERIOD to  
21 initiate a time-delay phosphorylation circuit that sets circadian clock speed. *Cell* *145*,  
22 357-370.  
23
- 24 Chiu, J.C., Vanselow, J.T., Kramer, A., and Edery, I. (2008). The phospho-occupancy of  
25 an atypical SLIMB-binding site on PERIOD that is phosphorylated by DOUBLETIME  
26 controls the pace of the clock. *Genes Dev* *22*, 1758-1772.  
27
- 28 Cordier, F., Chaffotte, A., Terrien, E., Prehaud, C., Theillet, F.X., Delepierre, M., Lafon,  
29 M., Buc, H., and Wolff, N. (2012). Ordered phosphorylation events in two independent  
30 cascades of the PTEN C-tail revealed by NMR. *J Am Chem Soc* *134*, 20533-20543.  
31
- 32 Crosby, P., and Partch, C.L. (2020). New insights into non-transcriptional regulation of  
33 mammalian core clock proteins. *J Cell Sci* *133*.  
34
- 35 Cullati, S.N., Chaikuad, A., Chen, J.S., Gebel, J., Tesmer, L., Zhubi, R., Navarrete-  
36 Perea, J., Guillen, R.X., Gygi, S.P., Hummer, G., et al. (2022). Kinase domain  
37 autophosphorylation rewires the activity and substrate specificity of CK1 enzymes. *Mol*  
38 *Cell*.  
39
- 40 D'Alessandro, M., Beesley, S., Kim, J.K., Chen, R., Abich, E., Cheng, W., Yi, P.,  
41 Takahashi, J.S., and Lee, C. (2015). A tunable artificial circadian clock in clock-  
42 defective mice. *Nat Commun* *6*, 8587.  
43
- 44 Darden, T., York, D., and Pedersen, L. (1993). Particle Mesh Ewald - an N.Log(N)  
45 Method for Ewald Sums in Large Systems. *J Chem Phys* *98*, 10089-10092.

- 1 Delaglio, F., Grzesiek, S., Vuister, G.W., Zhu, G., Pfeifer, J., and Bax, A. (1995).  
2 NMRPipe: a multidimensional spectral processing system based on UNIX pipes. *J*  
3 *Biomol NMR* 6, 277-293.  
4
- 5 Durgan, D.J., Pat, B.M., Laczy, B., Bradley, J.A., Tsai, J.Y., Grenett, M.H., Ratcliffe,  
6 W.F., Brewer, R.A., Nagendran, J., Villegas-Montoya, C., *et al.* (2011). O-  
7 GlcNAcylation, novel post-translational modification linking myocardial metabolism and  
8 cardiomyocyte circadian clock. *J Biol Chem* 286, 44606-44619.  
9
- 10 Dyla, M., Gonzalez Foutel, N.S., Otzen, D.E., and Kjaergaard, M. (2022). The optimal  
11 docking strength for reversibly tethered kinases. *Proc Natl Acad Sci U S A* 119,  
12 e2203098119.  
13
- 14 Eide, E.J., Woolf, M.F., Kang, H., Woolf, P., Hurst, W., Camacho, F., Vielhaber, E.L.,  
15 Giovanni, A., and Virshup, D.M. (2005). Control of mammalian circadian rhythm by  
16 CKepsilon-regulated proteasome-mediated PER2 degradation. *Mol Cell Biol* 25, 2795-  
17 2807.  
18
- 19 Emsley, P., Lohkamp, B., Scott, W.G., and Cowtan, K. (2010). Features and  
20 development of Coot. *Acta Crystallogr D Biol Crystallogr* 66, 486-501.  
21
- 22 Fan, J.Y., Preuss, F., Muskus, M.J., Bjes, E.S., and Price, J.L. (2009). *Drosophila* and  
23 vertebrate casein kinase I delta exhibits evolutionary conservation of circadian function.  
24 *Genetics* 181, 139-152.  
25
- 26 Flotow, H., Graves, P.R., Wang, A.Q., Fiol, C.J., Roeske, R.W., and Roach, P.J. (1990).  
27 Phosphate groups as substrate determinants for casein kinase I action. *J Biol Chem*  
28 265, 14264-14269.  
29
- 30 Flotow, H., and Roach, P.J. (1991). Role of acidic residues as substrate determinants  
31 for casein kinase I. *J Biol Chem* 266, 3724-3727.  
32
- 33 Gallego, M., Eide, E.J., Woolf, M.F., Virshup, D.M., and Forger, D.B. (2006a). An  
34 opposite role for tau in circadian rhythms revealed by mathematical modeling. *Proc Natl*  
35 *Acad Sci U S A* 103, 10618-10623.  
36
- 37 Gallego, M., Kang, H., and Virshup, D.M. (2006b). Protein phosphatase 1 regulates the  
38 stability of the circadian protein PER2. *Biochem J* 399, 169-175.  
39
- 40 Graves, P.R., and Roach, P.J. (1995). Role of COOH-terminal phosphorylation in the  
41 regulation of casein kinase I delta. *J Biol Chem* 270, 21689-21694.  
42
- 43 He, Q., Cha, J., He, Q., Lee, H.C., Yang, Y., and Liu, Y. (2006). CKI and CKII mediate  
44 the FREQUENCY-dependent phosphorylation of the WHITE COLLAR complex to close  
45 the *Neurospora* circadian negative feedback loop. *Genes Dev* 20, 2552-2565.  
46

- 1 Hornbeck, P.V., Zhang, B., Murray, B., Kornhauser, J.M., Latham, V., Skrzypek, E.  
2 (2015). PhosphoSitePlus, 2014: mutations, PTMs and recalibrations. *Nucleic Acids Res.*  
3 *43:D512-20.*  
4
- 5 Isojima, Y., Nakajima, M., Ukai, H., Fujishima, H., Yamada, R.G., Masumoto, K.H.,  
6 Kiuchi, R., Ishida, M., Ukai-Tadenuma, M., Minami, Y., *et al.* (2009). CKIepsilon/delta-  
7 dependent phosphorylation is a temperature-insensitive, period-determining process in  
8 the mammalian circadian clock. *Proc Natl Acad Sci U S A* *106*, 15744-15749.  
9
- 10 Jeon, M., Gardner, H.F., Miller, E.A., Deshler, J., and Rougvié, A.E. (1999). Similarity of  
11 the *C. elegans* developmental timing protein LIN-42 to circadian rhythm proteins.  
12 *Science* *286*, 1141-1146.  
13
- 14 Jin, Y.H., Joo, H., Lee, K., Kim, H., Didier, R., Yang, Y., Shin, H., and Lee, C. (2019).  
15 Streamlined procedure for gene knockouts using all-in-one adenoviral CRISPR-Cas9.  
16 *Sci Rep* *9*, 277.  
17
- 18 Jones, C.R., Huang, A.L., Ptacek, L.J., and Fu, Y.H. (2013). Genetic basis of human  
19 circadian rhythm disorders. *Exp Neurol* *243*, 28-33.  
20
- 21 Jorgensen, W.L., Chandrasekhar, J., Madura, J.D., Impey, R.W., and Klein, M.L.  
22 (1983). Comparison of Simple Potential Functions for Simulating Liquid Water. *J Chem*  
23 *Phys* *79*, 926-935.  
24
- 25 Kaasik, K., Kivimae, S., Allen, J.J., Chalkley, R.J., Huang, Y., Baer, K., Kissel, H.,  
26 Burlingame, A.L., Shokat, K.M., Ptacek, L.J., *et al.* (2013). Glucose sensor O-  
27 GlcNAcylation coordinates with phosphorylation to regulate circadian clock. *Cell Metab*  
28 *17*, 291-302.  
29
- 30 Kim, E.Y., Ko, H.W., Yu, W.J., Hardin, P.E., and Edery, I. (2007). A DOUBLETIME  
31 kinase binding domain on the *Drosophila* PERIOD protein is essential for its  
32 hyperphosphorylation, transcriptional repression, and circadian clock function.  
33 *Molecular and Cellular Biology* *27*, 5014-5028.  
34
- 35 Kivimae, S., Saez, L., and Young, M.W. (2008). Activating PER repressor through a  
36 DBT-directed phosphorylation switch. *PLoS Biol* *6*, e183.  
37
- 38 Ko, H.W., Kim, E.Y., Chiu, J., Vanselow, J.T., Kramer, A., and Edery, I. (2010). A  
39 hierarchical phosphorylation cascade that regulates the timing of PERIOD nuclear entry  
40 reveals novel roles for proline-directed kinases and GSK-3beta/SGG in circadian clocks.  
41 *J Neurosci* *30*, 12664-12675.  
42
- 43 Koike, N., Yoo, S.H., Huang, H.C., Kumar, V., Lee, C., Kim, T.K., and Takahashi, J.S.  
44 (2012). Transcriptional architecture and chromatin landscape of the core circadian clock  
45 in mammals. *Science* *338*, 349-354.  
46

- 1 Konopka, R.J., and Benzer, S. (1971). Clock mutants of *Drosophila melanogaster*. *Proc*  
2 *Natl Acad Sci U S A* *68*, 2112-2116.  
3
- 4 Lee, C., Etchegaray, J.P., Cagampang, F.R., Loudon, A.S., and Reppert, S.M. (2001).  
5 Posttranslational mechanisms regulate the mammalian circadian clock. *Cell* *107*, 855-  
6 867.  
7
- 8 Lee, C., Weaver, D.R., and Reppert, S.M. (2004). Direct association between mouse  
9 PERIOD and CKepsilon is critical for a functioning circadian clock. *Mol Cell Biol* *24*,  
10 584-594.  
11
- 12 Lee, H.M., Chen, R.M., Kim, H., Etchegaray, J.P., Weaver, D.R., and Lee, C. (2011a).  
13 The period of the circadian oscillator is primarily determined by the balance between  
14 casein kinase 1 and protein phosphatase 1. *P Natl Acad Sci USA* *108*, 16451-16456.  
15
- 16 Lee, Y., Chen, R., Lee, H.M., and Lee, C. (2011b). Stoichiometric relationship among  
17 clock proteins determines robustness of circadian rhythms. *J Biol Chem* *286*, 7033-  
18 7042.  
19
- 20 Levine, D.C., Hong, H., Weidemann, B.J., Ramsey, K.M., Affinati, A.H., Schmidt, M.S.,  
21 Cedernaes, J., Omura, C., Braun, R., Lee, C., *et al.* (2020). NAD(+) Controls Circadian  
22 Reprogramming through PER2 Nuclear Translocation to Counter Aging. *Mol Cell* *78*,  
23 835-849 e837.  
24
- 25 Liu, X., Chen, A., Caicedo-Casso, A., Cui, G., Du, M., He, Q., Lim, S., Kim, H.J., Hong,  
26 C.I., and Liu, Y. (2019). FRQ-CK1 interaction determines the period of circadian  
27 rhythms in *Neurospora*. *Nat Commun* *10*, 4352.  
28
- 29 Longenecker, K.L., Roach, P.J., and Hurley, T.D. (1996). Three-dimensional structure of  
30 mammalian casein kinase I: molecular basis for phosphate recognition. *J Mol Biol* *257*,  
31 618-631.  
32
- 33 Lowrey, P.L., Shimomura, K., Antoch, M.P., Yamazaki, S., Zemenides, P.D., Ralph,  
34 M.R., Menaker, M., and Takahashi, J.S. (2000). Positional syntenic cloning and  
35 functional characterization of the mammalian circadian mutation tau. *Science* *288*, 483-  
36 492.  
37
- 38 Maier, J.A., Martinez, C., Kasavajhala, K., Wickstrom, L., Hauser, K.E., and Simmerling,  
39 C. (2015). ff14SB: Improving the Accuracy of Protein Side Chain and Backbone  
40 Parameters from ff99SB. *Journal of Chemical Theory and Computation* *11*, 3696-3713.  
41
- 42 Marin, O., Bustos, V.H., Cesaro, L., Meggio, F., Pagano, M.A., Antonelli, M., Allende,  
43 C.C., Pinna, L.A., and Allende, J.E. (2003). A noncanonical sequence phosphorylated  
44 by casein kinase 1 in beta-catenin may play a role in casein kinase 1 targeting of  
45 important signaling proteins. *Proc Natl Acad Sci U S A* *100*, 10193-10200.  
46

- 1 Marzoll, D., Serrano, F.E., Shostak, A., Schunke, C., Diernfellner, A.C.R., and Brunner,  
2 M. (2022). Casein kinase 1 and disordered clock proteins form functionally equivalent,  
3 phospho-based circadian modules in fungi and mammals. *Proc Natl Acad Sci U S A*  
4 *119*.
- 5  
6 Masuda, S., Narasimamurthy, R., Yoshitane, H., Kim, J.K., Fukada, Y., and Virshup,  
7 D.M. (2020). Mutation of a PER2 phosphodegron perturbs the circadian phosphoswitch.  
8 *Proc Natl Acad Sci U S A* *117*, 10888-10896.
- 9  
10 McCoy, A.J., Grosse-Kunstleve, R.W., Adams, P.D., Winn, M.D., Storoni, L.C., and  
11 Read, R.J. (2007). Phaser crystallographic software. *J Appl Crystallogr* *40*, 658-674.  
12
- 13 Miao, Y., Feher, V.A., and McCammon, J.A. (2015). Gaussian Accelerated Molecular  
14 Dynamics: Unconstrained Enhanced Sampling and Free Energy Calculation. *J Chem*  
15 *Theory Comput* *11*, 3584-3595.
- 16  
17 Michael, A.K., Fribourgh, J.L., Chelliah, Y., Sandate, C.R., Hura, G.L., Schneidman-  
18 Duhovny, D., Tripathi, S.M., Takahashi, J.S., and Partch, C.L. (2017). Formation of a  
19 repressive complex in the mammalian circadian clock is mediated by the secondary  
20 pocket of CRY1. *Proc Natl Acad Sci U S A* *114*, 1560-1565.
- 21  
22 Narasimamurthy, R., Hunt, S.R., Lu, Y., Fustin, J.M., Okamura, H., Partch, C.L., Forger,  
23 D.B., Kim, J.K., and Virshup, D.M. (2018). CK1delta/epsilon protein kinase primes the  
24 PER2 circadian phosphoswitch. *Proc Natl Acad Sci U S A* *115*, 5986-5991.
- 25  
26 Nawathean, P., Stoleru, D., and Rosbash, M. (2007). A small conserved domain of  
27 *Drosophila* PERIOD is important for circadian phosphorylation, nuclear localization, and  
28 transcriptional repressor activity. *Mol Cell Biol* *27*, 5002-5013.
- 29  
30 Nolen, B., Taylor, S., and Ghosh, G. (2004). Regulation of protein kinases; controlling  
31 activity through activation segment conformation. *Mol Cell* *15*, 661-675.  
32
- 33 Ohsaki, K., Oishi, K., Kozono, Y., Nakayama, K., Nakayama, K.I., and Ishida, N. (2008).  
34 The role of {beta}-TrCP1 and {beta}-TrCP2 in circadian rhythm generation by mediating  
35 degradation of clock protein PER2. *J Biochem* *144*, 609-618.
- 36  
37 Park, J.L., K; Kim, H; Shin, H; Lee, C (2022). Endogenous circadian reporter cell lines  
38 as an efficient platform for studying circadian mechanisms. Co-submitted with this  
39 manuscript.
- 40  
41 Patke, A., Young, M.W., and Axelrod, S. (2020). Molecular mechanisms and  
42 physiological importance of circadian rhythms. *Nat Rev Mol Cell Biol* *21*, 67-84.  
43
- 44 Philpott, J.M., Narasimamurthy, R., Ricci, C.G., Freeberg, A.M., Hunt, S.R., Yee, L.E.,  
45 Pelofsky, R.S., Tripathi, S., Virshup, D.M., and Partch, C.L. (2020). Casein kinase 1  
46 dynamics underlie substrate selectivity and the PER2 circadian phosphoswitch. *Elife* *9*.



- 1  
2 Reischl, S., Vanselow, K., Westermark, P.O., Thierfelder, N., Maier, B., Herzel, H., and  
3 Kramer, A. (2007). Beta-TrCP1-mediated degradation of PERIOD2 is essential for  
4 circadian dynamics. *J Biol Rhythms* 22, 375-386.  
5  
6 Rothenfluh, A., Abodeely, M., and Young, M.W. (2000). Short-period mutations of *per*  
7 affect a double-time-dependent step in the *Drosophila* circadian clock. *Curr Biol* 10,  
8 1399-1402.  
9  
10 Rutila, J.E., Edery, I., Hall, J.C., and Rosbash, M. (1992). The analysis of new short-  
11 period circadian rhythm mutants suggests features of *D. melanogaster* period gene  
12 function. *J Neurogenet* 8, 101-113.  
13  
14 Sathyanarayanan, S., Zheng, X., Xiao, R., and Sehgal, A. (2004). Posttranslational  
15 regulation of *Drosophila* PERIOD protein by protein phosphatase 2A. *Cell* 116, 603-615.  
16 Schmutz, I., Wendt, S., Schnell, A., Kramer, A., Mansuy, I.M., and Albrecht, U. (2011).  
17  
18 Protein Phosphatase 1 (PP1) Is a Post-Translational Regulator of the Mammalian  
19 Circadian Clock. *Plos One* 6.  
20  
21 Sekine, T., Yamaguchi, T., Hamano, K., Young, M.W., Shimoda, M., and Saez, L.  
22 (2008). Casein kinase I epsilon does not rescue double-time function in *Drosophila*  
23 despite evolutionarily conserved roles in the circadian clock. *J Biol Rhythms* 23, 3-15.  
24  
25 Sheffield, P., Garrard, S., and Derewenda, Z. (1999). Overcoming expression and  
26 purification problems of RhoGDI using a family of "parallel" expression vectors. *Protein*  
27 *Expr Purif* 15, 34-39.  
28  
29 Shinohara, Y., Koyama, Y.M., Ukai-Tadenuma, M., Hirokawa, T., Kikuchi, M., Yamada,  
30 R.G., Ukai, H., Fujishima, H., Umehara, T., Tainaka, K., *et al.* (2017). Temperature-  
31 Sensitive Substrate and Product Binding Underlie Temperature-Compensated  
32 Phosphorylation in the Clock. *Mol Cell* 67, 783-798 e720.  
33  
34 Smith, M.J., Marshall, C.B., Theillet, F.X., Binolfi, A., Selenko, P., and Ikura, M. (2015).  
35 Real-time NMR monitoring of biological activities in complex physiological  
36 environments. *Curr Opin Struct Biol* 32, 39-47.  
37  
38 Takahashi, J.S. (2017). Transcriptional architecture of the mammalian circadian clock.  
39 *Nat Rev Genet* 18, 164-179.  
40  
41 Toh, K.L., Jones, C.R., He, Y., Eide, E.J., Hinz, W.A., Virshup, D.M., Ptacek, L.J., and  
42 Fu, Y.H. (2001). An *hPer2* phosphorylation site mutation in familial advanced sleep  
43 phase syndrome. *Science* 291, 1040-1043.  
44  
45 Top, D., O'Neil, J.L., Merz, G.E., Dusad, K., Crane, B.R., and Young, M.W. (2018).  
46 CK1/Doubletime activity delays transcription activation in the circadian clock. *Elife* 7.

1  
2 Vanselow, K., Vanselow, J.T., Westermarck, P.O., Reischl, S., Maier, B., Korte, T.,  
3 Herrmann, A., Herzel, H., Schlosser, A., and Kramer, A. (2006). Differential effects of  
4 PER2 phosphorylation: molecular basis for the human familial advanced sleep phase  
5 syndrome (FASPS). *Genes Dev* 20, 2660-2672.  
6  
7 Venkatesan, A., Fan, J.Y., Bouyain, S., and Price, J.L. (2019). The Circadian tau  
8 Mutation in Casein Kinase 1 Is Part of a Larger Domain That Can Be Mutated to  
9 Shorten Circadian Period. *Int J Mol Sci* 20.  
10  
11 Vranken, W.F., Boucher, W., Stevens, T.J., Fogh, R.H., Pajon, A., Llinas, M., Ulrich,  
12 E.L., Markley, J.L., Ionides, J., and Laue, E.D. (2005). The CCPN data model for NMR  
13 spectroscopy: development of a software pipeline. *Proteins* 59, 687-696.  
14  
15 Winn, M.D., Ballard, C.C., Cowtan, K.D., Dodson, E.J., Emsley, P., Evans, P.R.,  
16 Keegan, R.M., Krissinel, E.B., Leslie, A.G., McCoy, A., *et al.* (2011). Overview of the  
17 CCP4 suite and current developments. *Acta Crystallogr D Biol Crystallogr* 67, 235-242.  
18  
19 Wu, G., Xu, G., Schulman, B.A., Jeffrey, P.D., Harper, J.W., and Pavletich, N.P. (2003).  
20 Structure of a beta-TrCP1-Skp1-beta-catenin complex: destruction motif binding and  
21 lysine specificity of the SCF(beta-TrCP1) ubiquitin ligase. *Mol Cell* 11, 1445-1456.  
22  
23 Xing, L., An, Y., Shi, G., Yan, J., Xie, P., Qu, Z., Zhang, Z., Liu, Z., Pan, D., and Xu, Y.  
24 (2017). Correlated evolution between CK1delta Protein and the Serine-rich Motif  
25 Contributes to Regulating the Mammalian Circadian Clock. *J Biol Chem* 292, 161-171.  
26  
27 Xu, Y., Padiath, Q.S., Shapiro, R.E., Jones, C.R., Wu, S.C., Saigoh, N., Saigoh, K.,  
28 Ptacek, L.J., and Fu, Y.H. (2005). Functional consequences of a CK1delta mutation  
29 causing familial advanced sleep phase syndrome. *Nature* 434, 640-644.  
30  
31 Xu, Y., Toh, K.L., Jones, C.R., Shin, J.Y., Fu, Y.H., and Ptacek, L.J. (2007). Modeling of  
32 a human circadian mutation yields insights into clock regulation by PER2. *Cell* 128, 59-  
33 70.  
34  
35 Yu, W., Zheng, H., Price, J.L., and Hardin, P.E. (2009). DOUBLETIME plays a  
36 noncatalytic role to mediate CLOCK phosphorylation and repress CLOCK-dependent  
37 transcription within the Drosophila circadian clock. *Mol Cell Biol* 29, 1452-1458.  
38  
39 Zeringo, N.A., and Bellizzi, J.J., 3rd (2014). A PER2-derived mechanism-based  
40 bisubstrate analog for casein kinase 1epsilon. *Chem Biol Drug Des* 84, 697-703.  
41  
42 Zhou, M., Kim, J.K., Eng, G.W., Forger, D.B., and Virshup, D.M. (2015). A Period2  
43 Phosphoswitch Regulates and Temperature Compensates Circadian Period. *Mol Cell*  
44 60, 77-88.  
45  
46
